# Supplementary material for: Anthropogenic Influence on Moth Populations: A Comparative Study in Southern Sweden
Source: MDPI journal article supplement (doi:10.3390/insects14080702), 2023-08-11
Supplement: s1 [file s1]

| Species name                   | Taxonomic family | Red list category | Year new to Småland | Year new to Västergötland | Individuals in Borås trap | Individuals in Kalmar trap | Color pattern variation | Length of flight period | Habitat preference | Host plant specificity | Overwintering stage |
|--------------------------------|------------------|-------------------|---------------------|---------------------------|---------------------------|----------------------------|-------------------------|-------------------------|--------------------|------------------------|---------------------|
| <i>Abraxas grossulariata</i>   | Geometridae      |                   | 1900                | 1900                      |                           |                            | 2                       | 6                       | Generalist         | 2                      | Larva               |
| <i>Abrostola tripartita</i>    | Noctuidae        |                   | 1900                | 1900                      | 6                         | 1                          | 0                       | 7                       | Generalist         | 2                      | Pupa                |
| <i>Abrostola triplosia</i>     | Noctuidae        |                   | 1900                | 1900                      | 10                        | 1                          | 0                       | 10                      | Generalist         | 2                      | Pupa                |
| <i>Acronicta aceris</i>        | Noctuidae        |                   | 1900                | 1900                      |                           | 1                          | 0                       | 8                       | Forest             | 3                      | Pupa                |
| <i>Acronicta auricoma</i>      | Noctuidae        |                   | 1900                | 1900                      | 15                        | 1                          | 1                       | 4                       | Generalist         | 3                      | Pupa                |
| <i>Acronicta cinerea</i>       | Noctuidae        |                   | 1900                | 1900                      |                           |                            | 1                       | 9                       | Open               | 3                      | Pupa                |
| <i>Acronicta cuspid</i>        | Noctuidae        |                   | 1900                | 1900                      | 2                         |                            | 0                       | 8                       | Forest             | 2                      | Pupa                |
| <i>Acronicta leporina</i>      | Noctuidae        |                   | 1900                | 1900                      |                           |                            | 1                       | 9                       | Forest             | 3                      | Pupa                |
| <i>Acronicta megocephala</i>   | Noctuidae        |                   | 1900                | 1900                      | 8                         |                            | 0                       | 6                       | Generalist         | 3                      | Pupa                |
| <i>Acronicta menyanthidis</i>  | Noctuidae        |                   | 1900                | 1900                      |                           |                            | 0                       | 8                       | Generalist         | 3                      | Pupa                |
| <i>Acronicta psi</i>           | Noctuidae        |                   | 1900                | 1900                      | 39                        | 2                          | 0                       | 9                       | Generalist         | 3                      | Pupa                |
| <i>Acronicta rumicis</i>       | Noctuidae        |                   | 1900                | 1900                      | 41                        | 7                          | 1                       | 12                      | Generalist         | 3                      | Pupa                |
| <i>Acronicta tridens</i>       | Noctuidae        |                   | 1900                | 1900                      |                           |                            | 0                       | 7                       | Generalist         | 3                      | Pupa                |
| <i>Actinotia polyodon</i>      | Noctuidae        |                   | 1900                | 1900                      |                           | 1                          | 0                       | 8                       | Open               | 2                      | Pupa                |
| <i>Agriopis marginaria</i>     | Geometridae      |                   | 1900                | 1900                      |                           | 3                          | 1                       | 3                       | Generalist         | 3                      | Pupa                |
| <i>Agrochola circealis</i>     | Noctuidae        |                   | 1900                | 1900                      | 5                         | 7                          | 0                       | 6                       | Generalist         | 3                      | Egg                 |
| <i>Agrochola helvola</i>       | Noctuidae        |                   | 1900                | 1900                      | 11                        |                            | 0                       | 6                       | Forest             | 3                      | Egg                 |
| <i>Agrochola litura</i>        | Noctuidae        |                   | 1900                | 1900                      |                           |                            | 0                       | 4                       | Forest             | 3                      | Egg                 |
| <i>Agrochola lola</i>          | Noctuidae        |                   | 1900                | 1900                      |                           |                            | 0                       | 6                       | Forest             | 3                      | Egg                 |
| <i>Agrotis clavus</i>          | Noctuidae        |                   | 1900                | 1900                      | 21                        | 33                         | 1                       | 5                       | Generalist         | 3                      | Larva               |
| <i>Agrotis exclamatoris</i>    | Noctuidae        |                   | 1900                | 1900                      | 76                        | 40                         | 1                       | 16                      | Generalist         | 3                      | Larva               |
| <i>Agrotis ipsilon</i>         | Noctuidae        |                   | 1900                | 1900                      | 2                         |                            | 1                       | 16                      | Generalist         | 3                      | Larva               |
| <i>Agrotis segetum</i>         | Noctuidae        |                   | 1900                | 1900                      |                           | 5                          | 2                       | 17                      | Generalist         | 3                      | Larva               |
| <i>Agrotis vestigialis</i>     | Noctuidae        |                   | 1900                | 1900                      |                           |                            | 1                       | 6                       | Open               | 3                      | Larva               |
| <i>Alcis jubata</i>            | Geometridae      |                   | 1900                | 1900                      |                           |                            | 2                       | 7                       | Generalist         | 3                      | Larva               |
| <i>Alcis repandata</i>         | Geometridae      |                   | 1900                | 1900                      | 84                        |                            | 2                       | 7                       | Generalist         | 3                      | Larva               |
| <i>Allophyes oxyacanthae</i>   | Noctuidae        |                   | 1900                | 1900                      | 55                        | 23                         | 0                       | 6                       | Generalist         | 2                      | Egg                 |
| <i>Alsophila aescularia</i>    | Geometridae      |                   | 1900                | 1900                      |                           | 5                          | 0                       | 3                       | Forest             | 3                      | Pupa                |
| <i>Ammonoconia caecimacul</i>  | Noctuidae        |                   | 1900                | 1900                      | 1                         |                            | 0                       | 7                       | Generalist         | 3                      | Egg                 |
| <i>Amphipoea oculaea</i>       | Noctuidae        |                   | 1900                | 1900                      | 17                        | 10                         | 1                       | 7                       | Generalist         | 3                      | Egg                 |
| <i>Amphipyra pyramidea</i>     | Noctuidae        |                   | 1900                | 1900                      | 6                         | 47                         | 0                       | 6                       | Generalist         | 3                      | Egg                 |
| <i>Anaplectoides prasina</i>   | Noctuidae        |                   | 1900                | 1900                      | 21                        |                            | 0                       | 7                       | Forest             | 3                      | Larva               |
| <i>Anarta myrtili</i>          | Noctuidae        |                   | 1900                | 1900                      |                           |                            | 0                       | 11                      | Open               | 2                      | Pupa                |
| <i>Anarta trifolii</i>         | Noctuidae        |                   | 1900                | 1900                      |                           |                            | 1                       | 13                      | Generalist         | 3                      | Pupa                |
| <i>Angerona prunaria</i>       | Geometridae      |                   | 1900                | 1900                      | 8                         |                            | 2                       | 4                       | Generalist         | 3                      | Larva               |
| <i>Anatype chi</i>             | Noctuidae        |                   | 1900                | 1900                      |                           |                            | 0                       | 5                       | Open               | 3                      | Egg                 |
| <i>Apamea crenata</i>          | Noctuidae        |                   | 1900                | 1900                      | 1                         |                            | 2                       | 7                       | Generalist         | 3                      | Larva               |
| <i>Apamea furva</i>            | Noctuidae        |                   | 1900                | 1900                      |                           | 2                          | 0                       | 6                       | Generalist         | 3                      | Larva               |
| <i>Apamea laterita</i>         | Noctuidae        |                   | 1900                | 1900                      | 4                         |                            | 0                       | 6                       | Open               | 3                      | Larva               |
| <i>Apamea monolypha</i>        | Noctuidae        |                   | 1900                | 1900                      | 19                        | 16                         | 1                       | 10                      | Generalist         | 3                      | Larva               |
| <i>Apamea oblonga</i>          | Noctuidae        |                   | 1900                | 1900                      |                           |                            | 1                       | 5                       | Generalist         | 3                      | Larva               |
| <i>Apamea sordens</i>          | Noctuidae        |                   | 1900                | 1900                      | 1                         |                            | 0                       | 6                       | Generalist         | 3                      | Larva               |
| <i>Aplocera plagiata</i>       | Geometridae      |                   | 1900                | 1900                      |                           | 14                         | 0                       | 13                      | Open               | 2                      | Larva               |
| <i>Apoda limacodes</i>         | Umicodidae       |                   | 1900                | 1900                      | 1                         | 4                          | 0                       | 3                       | Forest             | 2                      | Pupa                |
| <i>Archicrisis parthenias</i>  | Geometridae      |                   | 1900                | 1900                      |                           |                            | 1                       | 3                       | Forest             | 3                      | Pupa                |
| <i>Arctia aulica</i>           | Erebidae         |                   | 1900                | 1900                      |                           |                            | 0                       | 2                       | Open               | 3                      | Larva               |
| <i>Arctia caga</i>             | Erebidae         |                   | 1900                | 1900                      | 19                        | 1                          | 2                       | 9                       | Generalist         | 3                      | Larva               |
| <i>Arctia plantaginis</i>      | Erebidae         |                   | 1900                | 1900                      |                           |                            | 1                       | 6                       | Open               | 3                      | Larva               |
| <i>Arichanna melanaria</i>     | Geometridae      |                   | 1900                | 1900                      | 10                        |                            | 1                       | 7                       | Generalist         | 2                      | Larva               |
| <i>Atalmis rubricollis</i>     | Erebidae         |                   | 1900                | 1900                      | 18                        |                            | 0                       | 4                       | Open               | 3                      | Pupa                |
| <i>Autographa gamma</i>        | Noctuidae        |                   | 1900                | 1900                      | 23                        | 15                         | 0                       | 13                      | Generalist         | 3                      | Larva               |
| <i>Autographa jota</i>         | Noctuidae        |                   | 1900                | 1900                      |                           |                            | 0                       | 5                       | Generalist         | 3                      | Larva               |
| <i>Autographa pulchrina</i>    | Noctuidae        |                   | 1900                | 1900                      | 5                         |                            | 0                       | 6                       | Generalist         | 3                      | Larva               |
| <i>Axyليا putris</i>           | Noctuidae        |                   | 1900                | 1900                      | 2                         |                            | 0                       | 14                      | Generalist         | 3                      | Pupa                |
| <i>Biston betularia</i>        | Geometridae      |                   | 1900                | 1900                      | 42                        |                            | 2                       | 10                      | Generalist         | 3                      | Pupa                |
| <i>Brachylomia viminalis</i>   | Noctuidae        |                   | 1900                | 1900                      | 12                        |                            | 0                       | 8                       | Forest             | 3                      | Egg                 |
| <i>Bupalus piniaria</i>        | Geometridae      |                   | 1900                | 1900                      | 7                         |                            | 2                       | 10                      | Forest             | 2                      | Pupa                |
| <i>Cabera exanthemata</i>      | Geometridae      |                   | 1900                | 1900                      | 42                        | 2                          | 0                       | 10                      | Generalist         | 3                      | Pupa                |
| <i>Cabera pusaria</i>          | Geometridae      |                   | 1900                | 1900                      | 123                       | 9                          | 0                       | 10                      | Generalist         | 3                      | Pupa                |
| <i>Calliteara abietis</i>      | Erebidae         |                   | 1900                | 1900                      | 1                         |                            | 1                       | 5                       | Forest             | 2                      | Larva               |
| <i>Campaea margaritaria</i>    | Geometridae      |                   | 1900                | 1900                      | 70                        | 1                          | 0                       | 4                       | Generalist         | 3                      | Larva               |
| <i>Camptogramma bilinea</i>    | Geometridae      |                   | 1900                | 1900                      | 13                        |                            | 0                       | 8                       | Open               | 2                      | Larva               |
| <i>Caradrina clavipalpis</i>   | Noctuidae        |                   | 1900                | 1900                      |                           | 6                          | 1                       | 18                      | Generalist         | 3                      | Pupa                |
| <i>Caradrina morpheus</i>      | Noctuidae        |                   | 1900                | 1900                      | 126                       | 69                         | 1                       | 9                       | Generalist         | 3                      | Larva               |
| <i>Carsia sororata</i>         | Geometridae      |                   | 1900                | 1900                      |                           |                            | 2                       | 7                       | Generalist         | 2                      | Egg                 |
| <i>Catarhoe cuculata</i>       | Geometridae      |                   | 1900                | 1900                      |                           | 2                          | 0                       | 4                       | Open               | 2                      | Pupa                |
| <i>Cotocala fraxini</i>        | Erebidae         |                   | 1900                | 1900                      | 6                         |                            | 1                       | 4                       | Generalist         | 3                      | Egg                 |
| <i>Cotocala nupta</i>          | Erebidae         |                   | 1900                | 1900                      |                           |                            | 1                       | 6                       | Forest             | 2                      | Egg                 |
| <i>Ceramica pisi</i>           | Noctuidae        |                   | 1900                | 1900                      | 2                         |                            | 1                       | 7                       | Generalist         | 3                      | Pupa                |
| <i>Cerapteryx graminis</i>     | Noctuidae        |                   | 1900                | 1900                      | 36                        | 26                         | 0                       | 9                       | Generalist         | 3                      | Egg                 |
| <i>Cerastis rubricosa</i>      | Noctuidae        |                   | 1900                | 1900                      | 22                        | 1                          | 0                       | 6                       | Forest             | 3                      | Pupa                |
| <i>Cerura vinula</i>           | Notodontidae     |                   | 1900                | 1900                      |                           |                            | 1                       | 9                       | Generalist         | 3                      | Pupa                |
| <i>Charanyia trigrammica</i>   | Noctuidae        |                   | 1900                | 1900                      |                           | 5                          | 0                       | 6                       | Open               | 2                      | Larva               |
| <i>Chorissa obscurata</i>      | Geometridae      |                   | 1900                | 1900                      |                           |                            | 0                       | 6                       | Generalist         | 3                      | Larva               |
| <i>Chiasmia clathrata</i>      | Geometridae      |                   | 1900                | 1900                      | 8                         | 14                         | 2                       | 11                      | Open               | 3                      | Pupa                |
| <i>Chorissa viridata</i>       | Geometridae      |                   | 1900                | 1900                      | 1                         |                            | 0                       | 7                       | Open               | 2                      | Pupa                |
| <i>Chloroclysta miata</i>      | Geometridae      |                   | 1900                | 1900                      | 4                         |                            | 0                       | 15                      | Generalist         | 3                      | Larva               |
| <i>Chloroclysta siterata</i>   | Geometridae      |                   | 1900                | 1900                      | 16                        | 1                          | 1                       | 13                      | Generalist         | 3                      | Larva               |
| <i>Cidaria fulvata</i>         | Geometridae      |                   | 1900                | 1900                      |                           | 19                         | 0                       | 4                       | Open               | 2                      | Egg                 |
| <i>Cirrhia icteritia</i>       | Noctuidae        |                   | 1900                | 1900                      | 18                        | 15                         | 1                       | 6                       | Forest             | 3                      | Egg                 |
| <i>Cleora cinctaria</i>        | Geometridae      |                   | 1900                | 1900                      |                           | 1                          | 1                       | 4                       | Generalist         | 3                      | Pupa                |
| <i>Cleorades lichenaria</i>    | Geometridae      |                   | 1900                | 1900                      | 2                         | 1                          | 1                       | 6                       | Generalist         | 3                      | Larva               |
| <i>Clostera curtula</i>        | Notodontidae     |                   | 1900                | 1900                      | 1                         |                            | 0                       | 9                       | Forest             | 3                      | Pupa                |
| <i>Clostera pigra</i>          | Notodontidae     |                   | 1900                | 1900                      | 1                         | 1                          | 0                       | 10                      | Forest             | 3                      | Pupa                |
| <i>Colocasia coryli</i>        | Noctuidae        |                   | 1900                | 1900                      | 4                         |                            | 1                       | 4                       | Forest             | 3                      | Pupa                |
| <i>Colostygia pectinataria</i> | Geometridae      |                   | 1900                | 1900                      | 7                         | 1                          | 0                       | 7                       | Generalist         | 2                      | Larva               |
| <i>Colotois pennaria</i>       | Geometridae      |                   | 1900                | 1900                      | 84                        |                            | 1                       | 5                       | Forest             | 3                      | Egg                 |
| <i>Conistra rubiginea</i>      | Noctuidae        |                   | 1900                | 1900                      | 3                         | 1                          | 0                       | 10                      | Generalist         | 3                      | Imago               |
| <i>Conistra vaccinii</i>       | Noctuidae        |                   | 1900                | 1900                      | 136                       | 31                         | 2                       | 10                      | Generalist         | 3                      | Imago               |
| <i>Coscinio cribraria</i>      | Erebidae         |                   | 1900                | 1900                      |                           |                            | 1                       | 4                       | Forest             | 3                      | Larva               |
| <i>Cosmia trapezina</i>        | Noctuidae        |                   | 1900                | 1900                      | 44                        | 43                         | 2                       | 8                       | Generalist         | 3                      | Egg                 |
| <i>Cosmorhoe ocellata</i>      | Geometridae      |                   | 1900                | 1900                      | 64                        | 10                         | 0                       | 11                      | Generalist         | 2                      | Larva               |
| <i>Cossus cossus</i>           | Cossidae         |                   | 1900                | 1900                      |                           |                            | 0                       | 5                       | Generalist         | 3                      | Larva               |
| <i>Cracallis elingvaria</i>    | Geometridae      |                   | 1900                | 1900                      | 9                         | 11                         | 1                       | 5                       | Generalist         | 3                      | Larva               |
| <i>Cybosis mesomella</i>       | Erebidae         |                   | 1900                | 1900                      | 90                        |                            | 1                       | 6                       | Open               | 3                      | Larva               |
| <i>Cyclophora albipunctata</i> | Geometridae      |                   | 1900                | 1900                      | 7                         |                            | 0                       | 8                       | Generalist         | 2                      | Pupa                |
| <i>Cyclophora pendularia</i>   | Geometridae      |                   | 1900                | 1900                      |                           | 1                          | 0                       | 6                       | Forest             | 2                      | Pupa                |
| <i>Cyclophora punctaria</i>    | Geometridae      |                   | 1900                | 1900                      | 2                         | 2                          | 1                       | 10                      | Forest             | 3                      | Pupa                |
| <i>Dasyphila templi</i>        | Noctuidae        |                   | 1900                | 1900                      |                           |                            | 0                       | 7                       | Generalist         | 3                      | Imago               |
| <i>Deilephila elpenor</i>      | Sphingidae       |                   | 1900                | 1900                      | 4                         |                            | 0                       | 10                      | Generalist         | 3                      | Pupa                |
| <i>Deilephila porcellus</i>    | Sphingidae       |                   | 1900                | 1900                      | 2                         | 1                          | 0                       | 11                      | Open               | 2                      | Pupa                |
| <i>Deltote uncula</i>          | Noctuidae        |                   | 1900                | 1900                      |                           |                            | 0                       | 6                       | Generalist         | 2                      | Pupa                |
| <i>Dendrolimus pini</i>        | Lasiocampidae    |                   | 1900                | 1900                      | 3                         |                            | 1                       | 5                       | Forest             | 2                      | Larva               |
| <i>Diachrysis chrysis</i>      | Noctuidae        |                   | 1900                | 1900                      | 8                         | 1                          | 0                       | 10                      | Generalist         | 3                      | Larva               |
| <i>Diachrysis sannio</i>       | Erebidae         |                   | 1900                | 1900                      | 14                        |                            | 0                       | 7                       | Open               | 3                      | Larva               |
| <i>Diaphora mendica</i>        | Erebidae         |                   | 1900                | 1900                      | 2                         | 10                         | 0                       | 7                       | Open               | 3                      | Pupa                |
| <i>Diarsia brunnea</i>         | Noctuidae        |                   | 1900                | 1900                      | 266                       | 1                          | 0                       | 7                       | Generalist         | 3                      | Larva               |
| <i>Diarsia mendica</i>         | Noctuidae        |                   | 1900                | 1900                      | 11                        |                            | 2                       | 4                       | Generalist         | 3                      | Larva               |
| <i>Diarsia rubi</i>            | Noctuidae        |                   | 1900                | 1900                      |                           | 1                          | 0                       | 7                       | Generalist         | 3                      | Pupa                |
| <i>Dicycla oo</i>              | Noctuidae        | NT                | 1900                | 1900                      |                           | 2                          | 1                       | 6                       | Forest             | 2                      | Larva               |
| <i>Diloba caeruleocephala</i>  | Noctuidae        |                   | 1900                | 1900                      |                           | 5                          | 0                       | 4                       | Forest             | 3                      | Egg                 |
| <i>Drepana falcataria</i>      | Drepanidae       |                   | 1900                | 1900                      | 44                        |                            | 1                       | 9                       | Forest             | 3                      | Pupa                |
| <i>Drymonia ruficornis</i>     | Notodontidae     |                   | 1900                | 1900                      |                           | 4                          | 0                       | 6                       | Forest             | 2                      | Pupa                |
| <i>Dryobotodes eremita</i>     | Noctuidae        |                   | 1900                | 1900                      |                           | 3                          | 1                       | 4                       | Forest             | 2                      | Egg                 |
| <i>Dypterygia scabriuscula</i> | Noctuidae        |                   | 1900                | 1900                      |                           | 3                          | 0                       | 6                       | Forest             | 2                      | Pupa                |
| <i>Dysstroma citrata</i>       | Geometridae      |                   | 1900                | 1900                      | 92                        |                            | 2                       | 8                       | Generalist         | 3                      | Egg                 |
| <i>Dysstroma truncata</i>      | Geometridae      |                   | 1900                | 1900                      | 44                        |                            | 2                       | 14                      | Generalist         | 3                      | Larva               |
| <i>Earias clorana</i>          | Nolidae          |                   | 1900                | 1900                      |                           |                            | 0                       | 9                       | Generalist         | 2                      | Pupa                |
| <i>Ecliptopera silaceata</i>   | Geometridae      |                   | 1900                | 1900                      | 39                        |                            | 0                       | 11                      | Generalist         | 2                      | Pupa                |
| <i>Ectropis crepuscularia</i>  | Geometridae      |                   | 1900                | 1900                      | 7                         |                            | 2                       | 12                      | Generalist         | 3                      | Pupa                |
| <i>Ellema lurideola</i>        | Erebidae         |                   | 1900                | 1900                      | 1                         | 42                         | 0                       | 6                       | Generalist         | 3                      | Larva               |
| <i>Ellema lutarella</i>        | Erebidae         |                   | 1900                | 1900                      | 25                        | 8                          | 0                       | 3                       | Open               | 3                      | Larva               |
| <i>Electrophaes corylata</i>   | Geometridae      |                   | 1900                | 1900                      |                           |                            | 1                       | 7                       | Forest             | 3                      | Pupa                |
| <i>Ematurga atomaria</i>       | Geometridae      |                   | 1900                | 1900                      |                           |                            | 2                       | 12                      | Generalist         | 3                      | Pupa                |
| <i>Energia paleacea</i>        | Noctuidae        |                   | 1900                | 1900                      | 21                        | 1                          | 0                       | 7                       | Generalist         | 3                      | Egg                 |

|                                           |               |    |      |      |     |     |    |            |            |      |       |
|-------------------------------------------|---------------|----|------|------|-----|-----|----|------------|------------|------|-------|
| <i>Endromis versicolora</i>               | Endromidae    |    | 1900 | 1900 | 3   |     | 0  | 6          | Forest     | 3    | Pupa  |
| <i>Ennomos erosaria</i>                   | Geometridae   |    | 1900 | 1900 | 34  | 29  | 0  | 11         | Forest     | 2    | Egg   |
| <i>Entephria caesiata</i>                 | Geometridae   |    | 1900 | 1900 |     |     | 1  | 6          | Forest     | 2    | Larva |
| <i>Epione repandaria</i>                  | Geometridae   |    | 1900 | 1900 | 4   |     | 0  | 8          | Forest     | 2    | Egg   |
| <i>Epione vespertaria</i>                 | Geometridae   |    | 1900 | 1900 | 11  |     | 0  | 6          | Forest     | 3    | Egg   |
| <i>Epirranthis diversata</i>              | Geometridae   |    | 1900 | 1900 |     |     | 1  | 9          | Forest     | 3    | Pupa  |
| <i>Epirrhoe alternata</i>                 | Geometridae   |    | 1900 | 1900 | 111 | 161 | 1  | 8          | Generalist | 2    | Pupa  |
| <i>Epirrhoe galiata</i>                   | Geometridae   |    | 1900 | 1900 |     |     | 0  | 7          | Generalist | 2    | Pupa  |
| <i>Epirrhoe tristata</i>                  | Geometridae   |    | 1900 | 1900 | 16  |     | 1  | 8          | Open       | 2    | Pupa  |
| <i>Eriogaster lanestris</i>               | Lasiocampidae |    | 1900 | 1900 | 3   |     | 0  | 3          | Generalist | 3    | Pupa  |
| <i>Euchoeca nebulata</i>                  | Geometridae   |    | 1900 | 1900 |     |     | 0  | 6          | Forest     | 2    | Pupa  |
| <i>Euclidia glyphica</i>                  | Erebidae      |    | 1900 | 1900 |     |     | 0  | 7          | Open       | 2    | Pupa  |
| <i>Euclidia mi</i>                        | Erebidae      |    | 1900 | 1900 |     |     | 0  | 5          | Open       | 3    | Pupa  |
| <i>Eulithis populata</i>                  | Geometridae   |    | 1900 | 1900 | 156 |     | 2  | 10         | Generalist | 3    | Egg   |
| <i>Eulithis prunata</i>                   | Geometridae   |    | 1900 | 1900 | 7   | 2   | 1  | 8          | Generalist | 2    | Egg   |
| <i>Eulithis testata</i>                   | Geometridae   |    | 1900 | 1900 | 29  | 1   | 7  | Generalist | 3          | Egg  |       |
| <i>Eupithecia abietaria</i>               | Geometridae   |    | 1900 | 1900 |     |     | 1  | 6          | Forest     | 2    | Pupa  |
| <i>Eupithecia absinthiata</i>             | Geometridae   |    | 1900 | 1900 |     |     | 1  | 7          | Generalist | 3    | Pupa  |
| <i>Eupithecia centaureata</i>             | Geometridae   |    | 1900 | 1900 |     | 11  | 0  | 13         | Open       | 2    | Pupa  |
| <i>Eupithecia icterata</i>                | Geometridae   |    | 1900 | 1900 | 11  |     | 2  | 8          | Open       | 3    | Pupa  |
| <i>Eupithecia intricata</i>               | Geometridae   |    | 1900 | 1900 |     |     | 1  | 4          | Generalist | 2    | Pupa  |
| <i>Eupithecia lanceata</i>                | Geometridae   |    | 1900 | 1900 |     |     | 0  | 5          | Forest     | 2    | Pupa  |
| <i>Eupithecia pusillata</i>               | Geometridae   |    | 1900 | 1900 | 11  |     | 1  | 8          | Generalist | 2    | Egg   |
| <i>Eupithecia satyrata</i>                | Geometridae   |    | 1900 | 1900 |     |     | 1  | 7          | Generalist | 3    | Pupa  |
| <i>Eupithecia simplicata</i>              | Geometridae   |    | 1900 | 1900 |     |     | 1  | 7          | Generalist | 2    | Pupa  |
| <i>Eupithecia subfuscata</i>              | Geometridae   |    | 1900 | 1900 |     |     | 1  | 7          | Generalist | 3    | Pupa  |
| <i>Eupithecia succenturiata</i>           | Geometridae   |    | 1900 | 1900 |     |     | 1  | 12         | Open       | 3    | Pupa  |
| <i>Eupithecia vulgata</i>                 | Geometridae   |    | 1900 | 1900 |     |     | 1  | 8          | Generalist | 3    | Pupa  |
| <i>Euplexia lucipara</i>                  | Noctuidae     |    | 1900 | 1900 | 7   |     | 0  | 9          | Forest     | 3    | Pupa  |
| <i>Eupsilia transversa</i>                | Noctuidae     |    | 1900 | 1900 | 6   | 22  | 1  | 10         | Generalist | 3    | Imago |
| <i>Euxoa occulta</i>                      | Noctuidae     |    | 1900 | 1900 | 9   | 1   | 1  | 10         | Forest     | 3    | Larva |
| <i>Euxoa nigricans</i>                    | Noctuidae     |    | 1900 | 1900 | 1   | 4   | 0  | 7          | Generalist | 3    | Larva |
| <i>Euxoa obeliscus</i>                    | Noctuidae     |    | 1900 | 1900 |     | 5   | 0  | 7          | Open       | 3    | Larva |
| <i>Euxoa tritici</i>                      | Noctuidae     |    | 1900 | 1900 | 1   | 8   | 2  | 8          | Generalist | 3    | Larva |
| <i>Falcaria lacertinaria</i>              | Drepanidae    |    | 1900 | 1900 | 31  |     | 1  | 9          | Forest     | 3    | Pupa  |
| <i>Furcula furcula</i>                    | Notodontidae  |    | 1900 | 1900 | 4   |     | 0  | 8          | Generalist | 3    | Pupa  |
| <i>Gandaritis pyralata</i>                | Geometridae   |    | 1900 | 1900 | 6   | 2   | 1  | 7          | Forest     | 2    | Egg   |
| <i>Geometra papilionaria</i>              | Geometridae   |    | 1900 | 1900 | 6   |     | 0  | 7          | Generalist | 3    | Larva |
| <i>Gnaphos obfuscata</i>                  | Geometridae   |    | 1900 | 1900 |     |     | 0  | 7          | Generalist | 3    | Larva |
| <i>Graphiphora augur</i>                  | Noctuidae     |    | 1900 | 1900 |     |     | 0  | 7          | Generalist | 3    | Larva |
| <i>Gripoptis aprilina</i>                 | Noctuidae     |    | 1900 | 1900 | 9   | 3   | 0  | 6          | Forest     | 2    | Egg   |
| <i>Gynaephora fassellina</i>              | Erebidae      |    | 1900 | 1900 |     |     | 1  | 6          | Open       | 3    | Larva |
| <i>Hada plebeja</i>                       | Noctuidae     |    | 1900 | 1900 | 4   |     | 1  | 6          | Open       | 3    | Pupa  |
| <i>Hadena albimaculata</i>                | Noctuidae     |    | 1900 | 1900 |     |     | 0  | 4          | Open       | 2    | Pupa  |
| <i>Hadena confusa</i>                     | Noctuidae     |    | 1900 | 1900 |     |     | 0  | 10         | Open       | 2    | Pupa  |
| <i>Hecatera bicolorata</i>                | Noctuidae     |    | 1900 | 1900 |     |     | 2  | 4          | Open       | 3    | Pupa  |
| <i>Helatographa leucostigma</i>           | Noctuidae     |    | 1900 | 1900 | 7   |     | 2  | 7          | Generalist | 3    | Egg   |
| <i>Hemaris fuciformis</i>                 | Sphingidae    |    | 1900 | 1900 |     |     | 0  | 8          | Open       | 2    | Pupa  |
| <i>Hemaris tityus</i>                     | Sphingidae    |    | 1900 | 1900 |     |     | 0  | 11         | Open       | 1    | Pupa  |
| <i>Hepialus humuli</i>                    | Hepialidae    | NT | 1900 | 1900 | 1   |     | 0  | 6          | Open       | 3    | Larva |
| <i>Hoplodrina blanda</i>                  | Noctuidae     |    | 1900 | 1900 | 36  | 17  | 0  | 7          | Open       | 3    | Larva |
| <i>Hoplodrina octogenaria</i>             | Noctuidae     |    | 1900 | 1900 | 42  |     | 0  | 7          | Generalist | 3    | Larva |
| <i>Horisme tersata</i>                    | Geometridae   |    | 1900 | 1900 |     |     | 0  | 7          | Forest     | 3    | Pupa  |
| <i>Hydraecia micacea</i>                  | Noctuidae     |    | 1900 | 1900 | 38  | 32  | 1  | 10         | Generalist | 3    | Egg   |
| <i>Hydrillula pallustris</i>              | Noctuidae     |    | 1900 | 1900 |     |     | 1  | 4          | Open       | 2    | Larva |
| <i>Hydriomena furcata</i>                 | Geometridae   |    | 1900 | 1900 | 19  | 2   | 2  | 7          | Generalist | 3    | Egg   |
| <i>Hydriomena impluviata</i>              | Geometridae   |    | 1900 | 1900 | 6   |     | 2  | 7          | Generalist | 3    | Pupa  |
| <i>Hydriomena ruberata</i>                | Geometridae   |    | 1900 | 1900 |     |     | 2  | 5          | Generalist | 2    | Pupa  |
| <i>Hylaea fasciaria</i>                   | Geometridae   |    | 1900 | 1900 | 17  |     | 2  | 7          | Forest     | 2    | Larva |
| <i>Hyles gallii</i>                       | Sphingidae    |    | 1900 | 1900 |     |     | 0  | 8          | Generalist | 2    | Pupa  |
| <i>Hypena crassalis</i>                   | Erebidae      |    | 1900 | 1900 | 91  |     | 2  | 6          | Generalist | 2    | Pupa  |
| <i>Hypena proboscidalis</i>               | Erebidae      |    | 1900 | 1900 | 25  |     | 1  | 7          | Generalist | 2    | Larva |
| <i>Hypena rostralis</i>                   | Erebidae      |    | 1900 | 1900 |     |     | 2  | 13         | Generalist | 1    | Imago |
| <i>Idaea aversata</i>                     | Geometridae   |    | 1900 | 1900 | 103 | 123 | 1  | 8          | Generalist | 2    | Larva |
| <i>Idaea dimidiata</i>                    | Geometridae   |    | 1900 | 1900 |     |     | 0  | 7          | Generalist | 2    | Larva |
| <i>Idaea emarginata</i>                   | Geometridae   |    | 1900 | 1900 |     | 11  | 1  | 6          | Forest     | 3    | Larva |
| <i>Idaea pallidata</i>                    | Geometridae   |    | 1900 | 1900 |     |     | 0  | 5          | Open       | 2    | Larva |
| <i>Idaea seriata</i>                      | Geometridae   |    | 1900 | 1900 |     |     | 1  | 13         | Generalist | 2    | Larva |
| <i>Idaea serpentata</i>                   | Geometridae   |    | 1900 | 1900 |     |     | 0  | 4          | Open       | 2    | Larva |
| <i>Idaea straminata</i>                   | Geometridae   |    | 1900 | 1900 |     | 4   | 0  | 6          | Forest     | 3    | Larva |
| <i>Ipimorpha subtusa</i>                  | Noctuidae     |    | 1900 | 1900 |     |     | 0  | 7          | Forest     | 3    | Egg   |
| <i>Jodis lactearia</i>                    | Geometridae   |    | 1900 | 1900 | 7   |     | 0  | 3          | Generalist | 3    | Pupa  |
| <i>Jodis putata</i>                       | Geometridae   |    | 1900 | 1900 |     |     | 0  | 4          | Generalist | 2    | Pupa  |
| <i>Laconobia contigua</i>                 | Noctuidae     |    | 1900 | 1900 | 1   |     | 0  | 9          | Generalist | 3    | Pupa  |
| <i>Laconobia oleracea</i>                 | Noctuidae     |    | 1900 | 1900 | 6   | 1   | 0  | 13         | Generalist | 3    | Pupa  |
| <i>Laconobia susa</i>                     | Noctuidae     |    | 1900 | 1900 |     |     | 2  | 13         | Generalist | 3    | Pupa  |
| <i>Loathoe populi</i>                     | Sphingidae    |    | 1900 | 1900 | 65  | 1   | 1  | 11         | Generalist | 3    | Pupa  |
| <i>Lasiocampa quercus</i>                 | Lasiocampidae |    | 1900 | 1900 | 2   |     | 1  | 5          | Generalist | 3    | Pupa  |
| <i>Lasiocampa trifolii</i>                | Lasiocampidae |    | 1900 | 1900 |     | 1   | 1  | 7          | Generalist | 3    | Egg   |
| <i>Leucania comma</i>                     | Noctuidae     |    | 1900 | 1900 |     |     | 0  | 9          | Open       | 3    | Larva |
| <i>Leucania salicis</i>                   | Erebidae      |    | 1900 | 1900 |     |     | 0  | 7          | Forest     | 3    | Larva |
| <i>Lithophane furcifera</i>               | Noctuidae     |    | 1900 | 1900 |     |     | 0  | 12         | Forest     | 2    | Imago |
| <i>Lithophane ornitopus</i>               | Noctuidae     |    | 1900 | 1900 |     |     | 1  | 11         | Forest     | 2    | Imago |
| <i>Lithosia quadra</i>                    | Erebidae      |    | 1900 | 1900 |     |     | 0  | 6          | Generalist | 3    | Larva |
| <i>Lobophora halterata</i>                | Geometridae   |    | 1900 | 1900 |     | 5   | 1  | 5          | Forest     | 3    | Pupa  |
| <i>Lomaspilis marginata</i>               | Geometridae   |    | 1900 | 1900 | 26  | 2   | 10 | Generalist | 3          | Pupa |       |
| <i>Lycia hirtaria</i>                     | Geometridae   |    | 1900 | 1900 | 87  |     | 1  | 9          | Forest     | 3    | Pupa  |
| <i>Lycophotia porphyrea</i>               | Noctuidae     |    | 1900 | 1900 | 50  |     | 0  | 7          | Generalist | 3    | Larva |
| <i>Lygephila cracca</i>                   | Erebidae      |    | 1900 | 1900 |     |     | 0  | 7          | Generalist | 2    | Egg   |
| <i>Lygephila pastinum</i>                 | Erebidae      |    | 1900 | 1900 | 3   | 1   | 0  | 7          | Generalist | 2    | Larva |
| <i>Lygephila viciae</i>                   | Erebidae      |    | 1900 | 1900 |     |     | 1  | 6          | Forest     | 2    | Pupa  |
| <i>Lymantria monacha</i>                  | Erebidae      |    | 1900 | 1900 | 589 |     | 2  | 4          | Generalist | 2    | Egg   |
| <i>Lythria cruentaria</i>                 | Geometridae   |    | 1900 | 1900 |     |     | 2  | 8          | Open       | 2    | Pupa  |
| <i>Macaria brunneata</i>                  | Geometridae   |    | 1900 | 1900 | 23  |     | 0  | 8          | Generalist | 3    | Egg   |
| <i>Macaria liturata</i>                   | Geometridae   |    | 1900 | 1900 | 57  |     | 0  | 10         | Forest     | 2    | Pupa  |
| <i>Macaria notata</i> <i>Macaria</i>      | Geometridae   |    | 1900 | 1900 | 3   | 1   | 0  | 7          | Forest     | 3    | Pupa  |
| <i>Macaria signaria</i>                   | Geometridae   |    | 1900 | 1900 | 20  |     | 1  | 6          | Forest     | 2    | Pupa  |
| <i>Macaria wauaria</i>                    | Geometridae   |    | 1900 | 1900 | 3   | 3   | 0  | 7          | Forest     | 2    | Egg   |
| <i>Macrothylacia rubi</i>                 | Lasiocampidae |    | 1900 | 1900 |     |     | 0  | 5          | Generalist | 3    | Larva |
| <i>Malacosoma castrensis</i>              | Lasiocampidae |    | 1900 | 1900 |     |     | 0  | 7          | Open       | 3    | Egg   |
| <i>Malacosoma neustria</i>                | Lasiocampidae |    | 1900 | 1900 |     |     | 1  | 6          | Open       | 3    | Egg   |
| <i>Mamestra brassicae</i>                 | Noctuidae     |    | 1900 | 1900 |     |     | 1  | 15         | Generalist | 3    | Pupa  |
| <i>Mesapamea secalis</i> <i>Mesapamea</i> | Noctuidae     |    | 1900 | 1900 | 42  | 30  | 2  | 6          | Generalist | 3    | Larva |
| <i>Mesoleuca albicollata</i>              | Geometridae   |    | 1900 | 1900 | 1   |     | 0  | 6          | Generalist | 2    | Pupa  |
| <i>Mesotype didymata</i>                  | Geometridae   |    | 1900 | 1900 | 1   |     | 1  | 7          | Generalist | 3    | Egg   |
| <i>Mesotype paralleloides</i>             | Geometridae   |    | 1900 | 1900 |     |     | 0  | 4          | Open       | 2    | Egg   |
| <i>Mimos tiliae</i>                       | Sphingidae    |    | 1900 | 1900 |     |     | 2  | 8          | Forest     | 2    | Pupa  |
| <i>Miniotype odusta</i>                   | Noctuidae     |    | 1900 | 1900 | 2   |     | 0  | 6          | Open       | 3    | Larva |
| <i>Mythimna conigera</i>                  | Noctuidae     |    | 1900 | 1900 | 23  | 26  | 0  | 7          | Generalist | 3    | Larva |
| <i>Mythimna ferrago</i>                   | Noctuidae     |    | 1900 | 1900 | 45  | 8   | 0  | 7          | Generalist | 3    | Larva |
| <i>Mythimna pallens</i>                   | Noctuidae     |    | 1900 | 1900 |     |     | 1  | 13         | Generalist | 3    | Larva |
| <i>Naenia typica</i>                      | Noctuidae     |    | 1900 | 1900 |     |     | 0  | 8          | Generalist | 3    | Larva |
| <i>Noctua fimbriata</i>                   | Noctuidae     |    | 1900 | 1900 |     | 15  | 2  | 8          | Generalist | 3    | Larva |
| <i>Noctua orbona</i>                      | Noctuidae     |    | 1900 | 1900 |     | 5   | 1  | 11         | Generalist | 3    | Larva |
| <i>Noctua prunuba</i>                     | Noctuidae     |    | 1900 | 1900 | 124 | 510 | 2  | 8          | Generalist | 3    | Larva |
| <i>Nola cucullatella</i>                  | Nolidae       |    | 1900 | 1900 |     |     | 1  | 6          | Forest     | 3    | Larva |
| <i>Notodontia dramedarius</i>             | Notodontidae  |    | 1900 | 1900 | 21  | 1   | 1  | 10         | Forest     | 3    | Pupa  |
| <i>Notodontia tritophus</i>               | Notodontidae  |    | 1900 | 1900 |     |     | 1  | 10         |            |      |       |

|                                  |               |    |      |      |      |     |   |    |            |   |       |
|----------------------------------|---------------|----|------|------|------|-----|---|----|------------|---|-------|
| <i>Oligia latruncula</i>         | Noctuidae     |    | 1900 | 1900 |      | 4   | 1 | 8  | Generalist | 3 | Larva |
| <i>Oligia strigilis</i>          | Noctuidae     |    | 1900 | 1900 | 9    | 4   | 1 | 6  | Generalist | 3 | Larva |
| <i>Operophtera brumata</i>       | Geometridae   |    | 1900 | 1900 | 39   | 33  | 0 | 4  | Generalist | 3 | Egg   |
| <i>Opigena polygona</i>          | Noctuidae     |    | 1900 | 1900 |      | 1   | 0 | 7  | Open       | 3 | Larva |
| <i>Opisthograptis luteolata</i>  | Geometridae   |    | 1900 | 1900 |      | 1   | 0 | 8  | Generalist | 3 | Pupa  |
| <i>Orygia antiqua</i>            | Erebidae      |    | 1900 | 1900 | 2    |     | 0 | 6  | Generalist | 3 | Egg   |
| <i>Orthonama vittata</i>         | Geometridae   |    | 1900 | 1900 |      |     | 1 | 11 | Generalist | 2 | Larva |
| <i>Orthosia gothica</i>          | Noctuidae     |    | 1900 | 1900 | 1125 | 93  | 2 | 5  | Generalist | 3 | Pupa  |
| <i>Orthosia incerta</i>          | Noctuidae     |    | 1900 | 1900 | 45   | 93  | 2 | 6  | Generalist | 3 | Pupa  |
| <i>Panolis flammea</i>           | Noctuidae     |    | 1900 | 1900 | 51   |     | 0 | 5  | Generalist | 2 | Pupa  |
| <i>Papestra biren</i>            | Noctuidae     |    | 1900 | 1900 |      |     | 0 | 5  | Generalist | 3 | Pupa  |
| <i>Parascotia fuliginaria</i>    | Erebidae      |    | 1900 | 1900 | 3    |     | 0 | 6  | Generalist | 3 | Larva |
| <i>Parastichis suspecta</i>      | Noctuidae     |    | 1900 | 1900 | 4    |     | 1 | 5  | Forest     | 3 | Egg   |
| <i>Paractropis similaria</i>     | Geometridae   |    | 1900 | 1900 |      |     | 1 | 6  | Forest     | 2 | Pupa  |
| <i>Pasiphila rectangulata</i>    | Geometridae   |    | 1900 | 1900 | 2    |     | 2 | 5  | Forest     | 3 | Egg   |
| <i>Pechipogon strigilata</i>     | Erebidae      |    | 1900 | 1900 |      |     | 1 | 6  | Forest     | 3 | Larva |
| <i>Pelurga comitata</i>          | Geometridae   |    | 1900 | 1900 |      |     | 0 | 7  | Generalist | 3 | Pupa  |
| <i>Percnolia strigillaria</i>    | Geometridae   |    | 1900 | 1900 |      |     | 0 | 7  | Open       | 2 | Larva |
| <i>Peribatodes secundaria</i>    | Geometridae   |    | 1900 | 1900 | 137  |     | 1 | 5  | Forest     | 3 | Larva |
| <i>Peridea anceps</i>            | Notodontidae  |    | 1900 | 1900 |      | 1   | 1 | 6  | Forest     | 2 | Pupa  |
| <i>Perizoma affinitata</i>       | Geometridae   |    | 1900 | 1900 |      |     | 0 | 7  | Generalist | 1 | Pupa  |
| <i>Perizoma albulata</i>         | Geometridae   |    | 1900 | 1900 |      |     | 1 | 10 | Open       | 1 | Pupa  |
| <i>Perizoma alchemillata</i>     | Geometridae   |    | 1900 | 1900 | 31   |     | 0 | 7  | Generalist | 2 | Pupa  |
| <i>Perizoma flavofasciata</i>    | Geometridae   | NT | 1900 | 1900 | 1    |     | 0 | 7  | Forest     | 1 | Pupa  |
| <i>Petrophora chlorosata</i>     | Geometridae   |    | 1900 | 1900 | 3    |     | 0 | 4  | Generalist | 2 | Pupa  |
| <i>Phalera bucephala</i>         | Notodontidae  |    | 1900 | 1900 | 50   | 2   | 0 | 8  | Generalist | 3 | Pupa  |
| <i>Pheosia gnoma</i>             | Notodontidae  |    | 1900 | 1900 | 132  | 4   | 1 | 10 | Generalist | 2 | Pupa  |
| <i>Pheosia tremula</i>           | Notodontidae  |    | 1900 | 1900 |      |     | 0 | 11 | Generalist | 2 | Pupa  |
| <i>Phibalapteryx virgata</i>     | Geometridae   |    | 1900 | 1900 |      |     | 1 | 12 | Open       | 2 | Pupa  |
| <i>Philereme vetulata</i>        | Geometridae   | NT | 1900 | 1900 |      | 1   | 0 | 6  | Open       | 2 | Egg   |
| <i>Phragmatobia fuliginosa</i>   | Erebidae      |    | 1900 | 1900 | 4    | 2   | 0 | 3  | Generalist | 3 | Larva |
| <i>Phyllodesma ilicifolia</i>    | Lasiocampidae |    | 1900 | 1900 | 3    |     | 0 | 6  | Generalist | 3 | Pupa  |
| <i>Phymatopus hecta</i>          | Hepialidae    |    | 1900 | 1900 | 9    |     | 0 | 8  | Generalist | 3 | Larva |
| <i>Phytometra viridaria</i>      | Erebidae      |    | 1900 | 1900 |      |     | 0 | 9  | Open       | 1 | Pupa  |
| <i>Plagodis dolabraria</i>       | Geometridae   |    | 1900 | 1900 | 3    |     | 0 | 7  | Forest     | 3 | Pupa  |
| <i>Plagodis pulveraria</i>       | Geometridae   |    | 1900 | 1900 | 1    |     | 1 | 5  | Generalist | 3 | Pupa  |
| <i>Plemyria rubiginata</i>       | Geometridae   |    | 1900 | 1900 | 2    |     | 0 | 5  | Forest     | 3 | Egg   |
| <i>Plusia festucae Plusia p.</i> | Noctuidae     |    | 1900 | 1900 |      | 1   | 0 | 4  | Generalist | 3 | Larva |
| <i>Poecilocampa populi</i>       | Lasiocampidae |    | 1900 | 1900 | 38   | 2   | 0 | 3  | Generalist | 3 | Egg   |
| <i>Polia bombycina</i>           | Noctuidae     |    | 1900 | 1900 | 3    |     | 1 | 7  | Generalist | 3 | Larva |
| <i>Polia hepatica</i>            | Noctuidae     |    | 1900 | 1900 | 2    |     | 0 | 7  | Generalist | 3 | Larva |
| <i>Polia nebulosa</i>            | Noctuidae     |    | 1900 | 1900 | 8    |     | 0 | 4  | Generalist | 3 | Larva |
| <i>Polyommis polymita</i>        | Noctuidae     |    | 1900 | 1900 |      |     | 0 | 6  | Open       | 3 | Egg   |
| <i>Polyopogon tentacularia</i>   | Erebidae      |    | 1900 | 1900 |      |     | 0 | 8  | Generalist | 3 | Larva |
| <i>Pseudopsis prasina</i>        | Nolidae       |    | 1900 | 1900 |      |     | 0 | 7  | Forest     | 3 | Pupa  |
| <i>Pteropharypteryx sexualis</i> | Geometridae   |    | 1900 | 1900 |      |     | 0 | 7  | Generalist | 3 | Pupa  |
| <i>Pterostoma palpina</i>        | Notodontidae  |    | 1900 | 1900 | 10   | 1   | 1 | 11 | Generalist | 3 | Pupa  |
| <i>Ptilodon capucina</i>         | Notodontidae  |    | 1900 | 1900 | 29   |     | 1 | 11 | Forest     | 3 | Pupa  |
| <i>Ptilophara plumigera</i>      | Notodontidae  |    | 1900 | 1900 |      | 8   | 1 | 2  | Forest     | 1 | Egg   |
| <i>Rheumaptera hastata</i>       | Geometridae   |    | 1900 | 1900 |      |     | 1 | 5  | Open       | 3 | Pupa  |
| <i>Rheumaptera undulata</i>      | Geometridae   |    | 1900 | 1900 | 5    |     | 0 | 7  | Generalist | 3 | Pupa  |
| <i>Rhodastrophia vibicaria</i>   | Geometridae   |    | 1900 | 1900 |      |     | 2 | 8  | Open       | 3 | Larva |
| <i>Rhyacia simulans</i>          | Noctuidae     |    | 1900 | 1900 |      |     | 0 | 8  | Generalist | 3 | Larva |
| <i>Rivula sericealis</i>         | Erebidae      |    | 1900 | 1900 |      |     | 1 | 11 | Generalist | 3 | Larva |
| <i>Rusina ferruginea</i>         | Noctuidae     |    | 1900 | 1900 | 111  | 43  | 0 | 6  | Generalist | 3 | Larva |
| <i>Saturnia pavonia</i>          | Saturniidae   |    | 1900 | 1900 |      |     | 0 | 8  | Generalist | 3 | Pupa  |
| <i>Scoliopteryx libatrix</i>     | Erebidae      |    | 1900 | 1900 | 1    |     | 0 | 18 | Generalist | 3 | Imago |
| <i>Scopula flosclatata</i>       | Geometridae   |    | 1900 | 1900 |      |     | 1 | 4  | Forest     | 3 | Larva |
| <i>Scopula immorata</i>          | Geometridae   |    | 1900 | 1900 |      |     | 0 | 6  | Open       | 2 | Larva |
| <i>Scopula immutata</i>          | Geometridae   |    | 1900 | 1900 | 27   |     | 0 | 7  | Open       | 3 | Larva |
| <i>Scopula incanata</i>          | Geometridae   |    | 1900 | 1900 | 1    |     | 1 | 6  | Open       | 3 | Larva |
| <i>Scopula ternata</i>           | Geometridae   |    | 1900 | 1900 | 3    |     | 0 | 6  | Open       | 3 | Larva |
| <i>Scotopteryx chenopodia</i>    | Geometridae   |    | 1900 | 1900 |      | 10  | 1 | 6  | Generalist | 2 | Larva |
| <i>Selenia dentaria</i>          | Geometridae   |    | 1900 | 1900 |      |     | 1 | 12 | Generalist | 3 | Pupa  |
| <i>Selenia lunularia</i>         | Geometridae   |    | 1900 | 1900 |      |     | 1 | 7  | Forest     | 3 | Pupa  |
| <i>Setina irrorella</i>          | Erebidae      |    | 1900 | 1900 |      |     | 1 | 6  | Open       | 3 | Larva |
| <i>Sideridis reticulata</i>      | Noctuidae     |    | 1900 | 1900 |      |     | 0 | 7  | Open       | 3 | Pupa  |
| <i>Sideridis rivularis</i>       | Noctuidae     |    | 1900 | 1900 | 11   | 2   | 0 | 12 | Open       | 2 | Pupa  |
| <i>Siona lineata</i>             | Geometridae   |    | 1900 | 1900 | 6    |     | 0 | 7  | Open       | 3 | Larva |
| <i>Smerinthus ocellata</i>       | Sphingidae    |    | 1900 | 1900 | 15   | 2   | 0 | 8  | Forest     | 3 | Pupa  |
| <i>Spaelotis ravida</i>          | Noctuidae     |    | 1900 | 1900 |      | 3   | 0 | 9  | Open       | 3 | Larva |
| <i>Sphinx ligustri</i>           | Sphingidae    |    | 1900 | 1900 |      |     | 0 | 6  | Generalist | 2 | Pupa  |
| <i>Sphinx pinastri</i>           | Sphingidae    |    | 1900 | 1900 | 58   |     | 0 | 13 | Forest     | 2 | Pupa  |
| <i>Spilosoma lubricipeda</i>     | Erebidae      |    | 1900 | 1900 | 62   |     | 2 | 3  | Open       | 3 | Pupa  |
| <i>Storinfussiana lucerna</i>    | Noctuidae     |    | 1900 | 1900 |      |     | 0 | 8  | Generalist | 2 | Larva |
| <i>Stauraphora celsia</i>        | Noctuidae     |    | 1900 | 1900 |      |     | 0 | 4  | Open       | 3 | Egg   |
| <i>Stauropus fagi</i>            | Notodontidae  |    | 1900 | 1900 | 2    |     | 0 | 11 | Forest     | 3 | Pupa  |
| <i>Syngrapha interrogatoria</i>  | Noctuidae     |    | 1900 | 1900 |      |     | 0 | 6  | Generalist | 3 | Larva |
| <i>Tethea or</i>                 | Drepanidae    |    | 1900 | 1900 | 8    | 1   | 2 | 7  | Forest     | 3 | Pupa  |
| <i>Thalera fimbrialis</i>        | Geometridae   |    | 1900 | 1900 |      |     | 0 | 7  | Generalist | 2 | Larva |
| <i>Thera cognata</i>             | Geometridae   |    | 1900 | 1900 | 3    |     | 1 | 6  | Open       | 2 | Egg   |
| <i>Thera juniperata</i>          | Geometridae   |    | 1900 | 1900 | 11   |     | 1 | 4  | Open       | 2 | Egg   |
| <i>Thera variata</i>             | Geometridae   |    | 1900 | 1900 | 74   | 4   | 2 | 5  | Forest     | 2 | Larva |
| <i>Tholera cespitis</i>          | Noctuidae     |    | 1900 | 1900 |      | 13  | 0 | 5  | Open       | 3 | Egg   |
| <i>Tholera decimilis</i>         | Noctuidae     |    | 1900 | 1900 | 30   | 5   | 0 | 5  | Open       | 3 | Egg   |
| <i>Thyatira batis</i>            | Drepanidae    |    | 1900 | 1900 | 2    |     | 0 | 10 | Generalist | 3 | Pupa  |
| <i>Tiliacea citrago</i>          | Noctuidae     |    | 1900 | 1900 | 3    |     | 1 | 4  | Forest     | 1 | Egg   |
| <i>Timandra comae Timan</i>      | Geometridae   |    | 1900 | 1900 | 22   | 22  | 0 | 14 | Generalist | 3 | Larva |
| <i>Trichopteryx carpinata</i>    | Geometridae   |    | 1900 | 1900 |      |     | 0 | 5  | Generalist | 3 | Pupa  |
| <i>Triadia sylvina</i>           | Hepialidae    |    | 1900 | 1900 | 14   | 72  | 1 | 4  | Generalist | 3 | Larva |
| <i>Triphosa dubitata</i>         | Geometridae   |    | 1900 | 1900 |      |     | 0 | 14 | Open       | 3 | Larva |
| <i>Xanthia togata</i>            | Noctuidae     |    | 1900 | 1900 | 4    | 9   | 0 | 7  | Generalist | 3 | Egg   |
| <i>Xanthorhoe designata</i>      | Geometridae   |    | 1900 | 1900 | 3    |     | 0 | 10 | Forest     | 1 | Pupa  |
| <i>Xanthorhoe ferrugata</i>      | Geometridae   |    | 1900 | 1900 | 104  | 13  | 2 | 12 | Generalist | 3 | Pupa  |
| <i>Xanthorhoe fluctuata</i>      | Geometridae   |    | 1900 | 1900 | 4    | 28  | 1 | 13 | Generalist | 3 | Pupa  |
| <i>Xanthorhoe montanata</i>      | Geometridae   |    | 1900 | 1900 | 33   |     | 2 | 6  | Generalist | 3 | Larva |
| <i>Xanthorhoe quadrifaria</i>    | Geometridae   |    | 1900 | 1900 | 4    |     | 1 | 7  | Generalist | 3 | Larva |
| <i>Xanthorhoe spadicaria</i>     | Geometridae   |    | 1900 | 1900 | 7    |     | 1 | 11 | Forest     | 3 | Pupa  |
| <i>Xestia c-nigrum</i>           | Noctuidae     |    | 1900 | 1900 | 19   | 102 | 1 | 16 | Generalist | 3 | Larva |
| <i>Xestia triangulum</i>         | Noctuidae     |    | 1900 | 1900 | 10   | 15  | 0 | 7  | Generalist | 3 | Larva |
| <i>Xylena exsoleta</i>           | Noctuidae     |    | 1900 | 1900 |      |     | 0 | 11 | Open       | 3 | Imago |
| <i>Xylena vetusta</i>            | Noctuidae     |    | 1900 | 1900 |      | 1   | 0 | 12 | Generalist | 3 | Imago |
| <i>Acherontia atropos</i>        | Sphingidae    |    | 1935 | 1900 |      |     | 1 | 10 | Generalist | 2 | Pupa  |
| <i>Acronicta alni</i>            | Noctuidae     |    | 1935 | 1900 |      |     | 2 | 6  | Forest     | 3 | Pupa  |
| <i>Agnus convolvuli</i>          | Sphingidae    |    | 1935 | 1900 |      |     | 0 | 9  | Generalist | 2 | Pupa  |
| <i>Apamea subultrix</i>          | Noctuidae     |    | 1935 | 1900 |      |     | 0 | 5  | Open       | 3 | Larva |
| <i>Biston strataria</i>          | Geometridae   |    | 1935 | 1900 | 20   | 26  | 1 | 5  | Forest     | 3 | Larva |
| <i>Catocala picta</i>            | Erebidae      |    | 1935 | 1900 |      |     | 0 | 6  | Generalist | 2 | Egg   |
| <i>Chersotis cuprea</i>          | Noctuidae     |    | 1935 | 1900 |      |     | 0 | 6  | Open       | 3 | Larva |
| <i>Coenophila subrosea</i>       | Noctuidae     |    | 1935 | 1900 | 4    |     | 0 | 4  | Generalist | 3 | Larva |
| <i>Craniophora ligustri</i>      | Noctuidae     | NT | 1935 | 1900 | 7    |     | 1 | 9  | Forest     | 3 | Pupa  |
| <i>Delleptenia ribeata</i>       | Geometridae   |    | 1935 | 1900 | 181  |     | 1 | 6  | Forest     | 3 | Larva |
| <i>Drepana curvatula</i>         | Drepanidae    |    | 1935 | 1900 |      |     | 1 | 9  | Forest     | 3 | Pupa  |
| <i>Elaphos vittaria</i>          | Geometridae   |    | 1935 | 1900 |      |     | 0 | 5  | Open       | 3 | Larva |
| <i>Erannis defoliaria</i>        | Geometridae   |    | 1935 | 1900 | 8    | 5   | 2 | 3  | Generalist | 3 | Egg   |
| <i>Eupithecia conterminata</i>   | Geometridae   |    | 1935 | 1900 |      |     | 0 | 5  | Forest     | 2 | Pupa  |
| <i>Hemistola chrysoprasaria</i>  | Geometridae   |    | 1935 | 1900 |      |     | 0 | 6  | Open       | 1 | Larva |
| <i>Idaea biselata</i>            | Geometridae   |    | 1935 | 1900 | 17   | 5   | 1 | 6  | Generalist | 2 | Larva |
| <i>Korscheltellus fusconeb</i>   | Hepialidae    |    | 1935 | 1900 | 26   | 1   | 1 | 7  | Generalist | 3 | Larva |
| <i>Larentia clavaria</i>         | Geometridae   |    | 1935 | 1900 | 1    |     | 1 | 3  | Open       | 2 | Egg   |
| <i>Lasionhada proxima</i>        | Noctuidae     |    | 1935 | 1900 |      |     | 0 | 9  | Generalist | 3 | Larva |
| <i>Laspeyria flexula</i>         | Erebidae      |    | 1935 | 1900 | 3    |     | 0 | 6  | Generalist | 3 | Larva |
| <i>Macario carbonaria</i>        | Geometridae   |    | 1935 | 1900 |      |     | 0 | 6  | Generalist | 2 | Pupa  |
| <i>Nonagria typhae</i>           | Noctuidae     |    | 1935 | 1900 | 2    | 3   | 2 | 9  | Generalist | 1 | Egg   |
| <i>Perizoma blandiata</i>        | Geometridae   |    | 1935 | 1900 | 1    |     | 1 | 4  | Open       | 1 | Pupa  |
| <i>Phigalia pilosaria</i>        | Geometridae   |    | 1935 | 1900 |      |     | 1 | 3  | Generalist | 3 | Pupa  |

|                                  |               |    |      |      |       |     |   |    |            |   |       |
|----------------------------------|---------------|----|------|------|-------|-----|---|----|------------|---|-------|
| <i>Photodes captiuncula</i>      | Noctuidae     |    | 1935 | 1900 |       |     | 0 | 6  | Open       | 2 | Larva |
| <i>Thalophila matura</i>         | Noctuidae     |    | 1935 | 1900 |       |     | 1 | 4  | Open       | 3 | Larva |
| <i>Xanthorhoe birivata</i>       | Geometridae   |    | 1935 | 1900 |       |     | 1 | 12 | Forest     | 1 | Pupa  |
| <i>Xestia bajo</i>               | Noctuidae     |    | 1935 | 1900 | 40    | 2   | 0 | 6  | Generalist | 3 | Larva |
| <i>Xestia xanthographa</i>       | Noctuidae     |    | 1935 | 1900 | 139   | 704 | 2 | 6  | Generalist | 3 | Larva |
| <i>Epilecta linogrisea</i>       | Noctuidae     |    | 1971 | 1900 |       |     | 0 | 5  | Generalist | 3 | Larva |
| <i>Cosmia pyralina</i>           | Noctuidae     |    | 1978 | 1900 |       |     | 0 | 5  | Forest     | 2 | Egg   |
| <i>Eclipoptera capitata</i>      | Geometridae   | VU | 2003 | 1900 | 1     |     | 0 | 5  | Forest     | 1 | Pupa  |
| <i>Xylocampa areola</i>          | Noctuidae     |    | 2019 | 1900 |       |     | 0 | 6  | Open       | 1 | Pupa  |
| <i>Epirrhoe hastulata</i>        | Geometridae   |    |      | 1900 |       |     | 1 | 4  | Open       | 2 | Pupa  |
| <i>Eriopygodes imbecilla</i>     | Noctuidae     |    |      | 1900 |       |     | 0 | 5  | Open       | 1 | Larva |
| <i>Aglia tau</i>                 | Saturniidae   |    | 1900 | 1935 |       |     | 0 | 5  | Forest     | 2 | Pupa  |
| <i>Agrochola nitida</i>          | Noctuidae     |    | 1900 | 1935 | 4     | 22  | 0 | 5  | Forest     | 3 | Egg   |
| <i>Calliteara pudibunda</i>      | Erebidae      |    | 1900 | 1935 | 6     |     | 2 | 6  | Forest     | 3 | Larva |
| <i>Denticucullus pygmaea</i>     | Noctuidae     |    | 1900 | 1935 | 41    |     | 1 | 6  | Open       | 2 | Egg   |
| <i>Diarsia dahlii</i>            | Noctuidae     |    | 1900 | 1935 | 19    |     | 1 | 6  | Forest     | 3 | Larva |
| <i>Eilema complana</i>           | Erebidae      |    | 1900 | 1935 | 85    | 30  | 0 | 9  | Generalist | 3 | Larva |
| <i>Ennomos alniaria</i>          | Geometridae   |    | 1900 | 1935 | 56    |     | 1 | 9  | Generalist | 3 | Egg   |
| <i>Eupithecia loricata</i>       | Geometridae   |    | 1900 | 1935 |       |     | 1 | 5  | Forest     | 2 | Pupa  |
| <i>Furcula bicuspis</i>          | Notodontidae  |    | 1900 | 1935 |       |     | 0 | 5  | Forest     | 3 | Pupa  |
| <i>Furcula bifida</i>            | Notodontidae  |    | 1900 | 1935 | 1     |     | 0 | 8  | Forest     | 3 | Pupa  |
| <i>Hermia tarsipennis</i>        | Erebidae      |    | 1900 | 1935 | 3     | 3   | 1 | 7  | Generalist | 3 | Larva |
| <i>Leucania obsoleta</i>         | Noctuidae     |    | 1900 | 1935 |       |     | 0 | 12 | Generalist | 3 | Larva |
| <i>Leucodonta bicoloria</i>      | Notodontidae  |    | 1900 | 1935 | 6     |     | 0 | 8  | Forest     | 2 | Pupa  |
| <i>Ligdia adustata</i>           | Geometridae   |    | 1900 | 1935 | 2     | 1   | 0 | 11 | Forest     | 1 | Pupa  |
| <i>Lithophane lamda</i>          | Noctuidae     |    | 1900 | 1935 |       |     | 0 | 12 | Generalist | 2 | Imago |
| <i>Lithophane socia</i>          | Noctuidae     |    | 1900 | 1935 | 11    | 1   | 0 | 12 | Forest     | 3 | Imago |
| <i>Macroglossum stellatar</i>    | Sphingidae    |    | 1900 | 1935 |       |     | 1 | 7  | Generalist | 2 | Imago |
| <i>Meganola strigula</i>         | Nolidae       |    | 1900 | 1935 |       |     | 0 | 4  | Forest     | 2 | Larva |
| <i>Noctua comes</i>              | Noctuidae     |    | 1900 | 1935 | 66    | 86  | 1 | 8  | Generalist | 3 | Larva |
| <i>Nola confusalis</i>           | Nolidae       |    | 1900 | 1935 |       |     | 0 | 6  | Forest     | 3 | Pupa  |
| <i>Notodonta tarva</i>           | Notodontidae  |    | 1900 | 1935 |       |     | 0 | 10 | Forest     | 2 | Pupa  |
| <i>Nyctea degenerana</i>         | Nolidae       |    | 1900 | 1935 |       |     | 1 | 13 | Forest     | 3 | Imago |
| <i>Orgyia recens</i>             | Erebidae      |    | 1900 | 1935 |       |     | 0 | 2  | Generalist | 3 | Larva |
| <i>Panthea coenobita</i>         | Noctuidae     |    | 1900 | 1935 | 9     |     | 0 | 7  | Forest     | 2 | Pupa  |
| <i>Pasiphila debiliata</i>       | Geometridae   |    | 1900 | 1935 |       |     | 0 | 6  | Generalist | 2 | Egg   |
| <i>Schrankia costaestrigalis</i> | Erebidae      |    | 1900 | 1935 |       |     | 1 | 5  | Generalist | 3 | Larva |
| <i>Sphragidius similis</i>       | Erebidae      |    | 1900 | 1935 |       |     | 0 | 5  | Forest     | 3 | Larva |
| <i>Spilarctia lutea</i>          | Erebidae      |    | 1900 | 1935 | 12    |     | 0 | 7  | Open       | 3 | Pupa  |
| <i>Thumatha senex</i>            | Erebidae      |    | 1900 | 1935 |       |     | 0 | 8  | Generalist | 2 | Larva |
| <i>Xestia stigmatica</i>         | Noctuidae     |    | 1900 | 1935 |       | 7   | 0 | 5  | Generalist | 3 | Larva |
| <i>Xylota solidaginis</i>        | Noctuidae     |    | 1900 | 1935 | 14    |     | 1 | 8  | Generalist | 3 | Egg   |
| <i>Abraxas sylvata</i>           | Geometridae   |    | 1935 | 1935 |       |     | 0 | 6  | Forest     | 1 | Pupa  |
| <i>Acasis virescens</i>          | Geometridae   |    | 1935 | 1935 |       |     | 1 | 4  | Forest     | 2 | Pupa  |
| <i>Achiya flavicornis</i>        | Drepanidae    |    | 1935 | 1935 |       |     | 1 | 3  | Forest     | 3 | Pupa  |
| <i>Actbia praecox</i>            | Noctuidae     |    | 1935 | 1935 | 20    |     | 1 | 7  | Open       | 3 | Larva |
| <i>Aethalura punctulata</i>      | Geometridae   |    | 1935 | 1935 |       |     | 0 | 5  | Forest     | 2 | Pupa  |
| <i>Agriopis aurantaria</i>       | Geometridae   |    | 1935 | 1935 | 17    |     | 0 | 3  | Forest     | 3 | Egg   |
| <i>Agriopis leucophaea</i>       | Geometridae   |    | 1935 | 1935 |       | 3   | 2 | 3  | Forest     | 2 | Pupa  |
| <i>Agrochola macilenta</i>       | Noctuidae     |    | 1935 | 1935 | 3     | 16  | 1 | 2  | Forest     | 3 | Egg   |
| <i>Agrotis cinerea</i>           | Noctuidae     |    | 1935 | 1935 |       |     | 2 | 7  | Open       | 3 | Larva |
| <i>Amphipoea cineraria</i>       | Noctuidae     | NT | 1935 | 1935 |       |     | 1 | 7  | Generalist | 1 | Egg   |
| <i>Amphipoea fuscata</i>         | Noctuidae     |    | 1935 | 1935 | 2     | 36  | 1 | 8  | Generalist | 3 | Egg   |
| <i>Amphipoea lucens</i>          | Noctuidae     |    | 1935 | 1935 |       |     | 1 | 7  | Generalist | 3 | Egg   |
| <i>Amphipyra tragopoginis</i>    | Noctuidae     |    | 1935 | 1935 |       | 9   | 0 | 9  | Generalist | 3 | Egg   |
| <i>Anticlea derivata</i>         | Geometridae   |    | 1935 | 1935 |       |     | 0 | 6  | Forest     | 1 | Pupa  |
| <i>Anticarsia sparsata</i>       | Geometridae   |    | 1935 | 1935 |       |     | 0 | 4  | Generalist | 2 | Pupa  |
| <i>Apamea anceps</i>             | Noctuidae     |    | 1935 | 1935 |       |     | 0 | 5  | Open       | 3 | Larva |
| <i>Apamea illiria</i>            | Noctuidae     |    | 1935 | 1935 | 2     |     | 0 | 4  | Forest     | 3 | Larva |
| <i>Apamea lithoxyla</i>          | Noctuidae     |    | 1935 | 1935 |       |     | 0 | 6  | Open       | 3 | Larva |
| <i>Apamea remissa</i>            | Noctuidae     |    | 1935 | 1935 | 3     | 2   | 2 | 8  | Generalist | 3 | Larva |
| <i>Apamea unanimitas</i>         | Noctuidae     |    | 1935 | 1935 | 4     |     | 0 | 6  | Open       | 3 | Larva |
| <i>Apeira syringaria</i>         | Geometridae   |    | 1935 | 1935 |       |     | 0 | 4  | Forest     | 2 | Larva |
| <i>Aparophylla luenenburgeri</i> | Noctuidae     |    | 1935 | 1935 |       | 19  | 2 | 4  | Open       | 3 | Egg   |
| <i>Archana dissoluta</i>         | Noctuidae     |    | 1935 | 1935 |       | 1   | 1 | 7  | Generalist | 1 | Egg   |
| <i>Archicaris natha</i>          | Geometridae   |    | 1935 | 1935 |       |     | 1 | 6  | Forest     | 2 | Pupa  |
| <i>Arctornis nigrum</i>          | Erebidae      |    | 1935 | 1935 |       |     | 0 | 16 | Forest     | 3 | Larva |
| <i>Arenostola phragmitidis</i>   | Noctuidae     |    | 1935 | 1935 |       | 1   | 0 | 5  | Generalist | 1 | Egg   |
| <i>Autographa bractea</i>        | Noctuidae     |    | 1935 | 1935 |       |     | 0 | 6  | Open       | 3 | Larva |
| <i>Bena bicolorana</i>           | Nolidae       |    | 1935 | 1935 |       |     | 0 | 7  | Forest     | 2 | Larva |
| <i>Brachionycha nubeculos</i>    | Noctuidae     |    | 1935 | 1935 |       |     | 0 | 6  | Forest     | 3 | Pupa  |
| <i>Bryophila raptricula</i>      | Noctuidae     |    | 1935 | 1935 |       |     | 1 | 7  | Generalist | 3 | Larva |
| <i>Calamia tridens</i>           | Noctuidae     |    | 1935 | 1935 |       |     | 0 | 6  | Open       | 2 | Egg   |
| <i>Calophasia lunula</i>         | Noctuidae     |    | 1935 | 1935 |       | 47  | 0 | 10 | Generalist | 1 | Pupa  |
| <i>Caradrina montana</i>         | Noctuidae     |    | 1935 | 1935 |       |     | 0 | 5  | Forest     | 3 | Larva |
| <i>Caradrina selini</i>          | Noctuidae     |    | 1935 | 1935 |       |     | 0 | 6  | Forest     | 3 | Larva |
| <i>Catocala promissa</i>         | Erebidae      |    | 1935 | 1935 |       |     | 0 | 4  | Forest     | 2 | Egg   |
| <i>Catocala sponso</i>           | Erebidae      |    | 1935 | 1935 | 2     |     | 0 | 6  | Forest     | 2 | Egg   |
| <i>Celaena haworthii</i>         | Noctuidae     |    | 1935 | 1935 |       |     | 0 | 6  | Generalist | 3 | Egg   |
| <i>Cephus advenaria</i>          | Geometridae   |    | 1935 | 1935 | 7     |     | 0 | 7  | Generalist | 2 | Pupa  |
| <i>Chilodes maritima</i>         | Noctuidae     |    | 1935 | 1935 | 1     | 1   | 2 | 4  | Generalist | 2 | Larva |
| <i>Chloantho hyperici</i>        | Noctuidae     |    | 1935 | 1935 |       |     | 0 | 10 | Generalist | 2 | Pupa  |
| <i>Cilix glaucata</i>            | Drepanidae    |    | 1935 | 1935 |       |     | 0 | 9  | Generalist | 2 | Pupa  |
| <i>Cirrhia gilvago</i>           | Noctuidae     |    | 1935 | 1935 |       |     | 1 | 6  | Open       | 1 | Egg   |
| <i>Colostygia olivata</i>        | Geometridae   |    | 1935 | 1935 | 2     |     | 0 | 5  | Open       | 2 | Larva |
| <i>Conistra erythrocephala</i>   | Noctuidae     |    | 1935 | 1935 |       | 20  | 2 | 11 | Forest     | 3 | Imago |
| <i>Conistra rubiginosa</i>       | Noctuidae     |    | 1935 | 1935 |       | 7   | 0 | 10 | Forest     | 3 | Imago |
| <i>Coranarta cordigera</i>       | Noctuidae     |    | 1935 | 1935 |       |     | 0 | 4  | Generalist | 2 | Pupa  |
| <i>Cosmotriche labulata</i>      | Lasiocampidae |    | 1935 | 1935 |       |     | 0 | 6  | Forest     | 2 | Larva |
| <i>Crypsedra gemma</i>           | Noctuidae     |    | 1935 | 1935 | 7     |     | 0 | 6  | Open       | 3 | Egg   |
| <i>Cuculia absinthii</i>         | Noctuidae     |    | 1935 | 1935 |       |     | 0 | 6  | Generalist | 2 | Pupa  |
| <i>Cuculia chamomillae</i>       | Noctuidae     |    | 1935 | 1935 |       |     | 0 | 4  | Open       | 2 | Pupa  |
| <i>Cuculia lactucae</i>          | Noctuidae     |    | 1935 | 1935 |       |     | 0 | 8  | Forest     | 2 | Pupa  |
| <i>Cuculia lucifuga</i>          | Noctuidae     |    | 1935 | 1935 |       |     | 0 | 6  | Forest     | 2 | Pupa  |
| <i>Cuculia umbratica</i>         | Noctuidae     |    | 1935 | 1935 | 2     |     | 0 | 6  | Generalist | 3 | Pupa  |
| <i>Cyclophora linearia</i>       | Geometridae   |    | 1935 | 1935 |       |     | 1 | 7  | Forest     | 1 | Pupa  |
| <i>Cyclophora quercimontana</i>  | Geometridae   |    | 1935 | 1935 |       |     | 0 | 6  | Forest     | 2 | Pupa  |
| <i>Deltote pygarga</i>           | Noctuidae     |    | 1935 | 1935 | 264   | 1   | 0 | 6  | Forest     | 2 | Pupa  |
| <i>Dyscia fagaria</i>            | Geometridae   |    | 1935 | 1935 |       |     | 0 | 5  | Open       | 2 | Pupa  |
| <i>Dysstroma infusata</i>        | Geometridae   |    | 1935 | 1935 | 3     |     | 1 | 3  | Generalist | 2 | Larva |
| <i>Dysstroma latefasciata</i>    | Geometridae   |    | 1935 | 1935 | 81    | 2   | 2 | 7  | Generalist | 2 | Larva |
| <i>Eorophila badiota</i>         | Geometridae   |    | 1935 | 1935 |       |     | 1 | 5  | Open       | 1 | Pupa  |
| <i>Eilema depressa</i>           | Erebidae      |    | 1935 | 1935 | 11174 | 1   | 0 | 12 | Generalist | 3 | Larva |
| <i>Ennomos fuscantaria</i>       | Geometridae   |    | 1935 | 1935 |       | 1   | 1 | 9  | Forest     | 1 | Egg   |
| <i>Ennomos quercinaria</i>       | Geometridae   |    | 1935 | 1935 | 1     |     | 1 | 7  | Forest     | 2 | Egg   |
| <i>Epipillia griseocens</i>      | Noctuidae     |    | 1935 | 1935 |       |     | 0 | 4  | Generalist | 3 | Egg   |
| <i>Epirrhoe rivata</i>           | Geometridae   |    | 1935 | 1935 |       |     | 1 | 7  | Open       | 2 | Pupa  |
| <i>Epirrita christyi</i>         | Geometridae   |    | 1935 | 1935 |       |     | 1 | 3  | Forest     | 3 | Egg   |
| <i>Epirrita dilutata</i>         | Geometridae   |    | 1935 | 1935 |       |     | 1 | 3  | Forest     | 3 | Egg   |
| <i>Eugnorisma glareosa</i>       | Noctuidae     |    | 1935 | 1935 | 13    |     | 1 | 5  | Open       | 2 | Larva |
| <i>Eugraphe sigma</i>            | Noctuidae     |    | 1935 | 1935 |       |     | 0 | 6  | Open       | 3 | Larva |
| <i>Eulithis melinata</i>         | Geometridae   |    | 1935 | 1935 | 13    |     | 1 | 8  | Forest     | 2 | Egg   |
| <i>Euphyia unangulata</i>        | Geometridae   |    | 1935 | 1935 | 5     |     | 0 | 10 | Forest     | 2 | Pupa  |
| <i>Eupithecia actaeata</i>       | Geometridae   |    | 1935 | 1935 |       |     | 1 | 8  | Forest     | 1 | Pupa  |
| <i>Eupithecia analoga</i>        | Geometridae   |    | 1935 | 1935 |       |     | 0 | 4  | Forest     | 2 | Pupa  |
| <i>Eupithecia assimilata</i>     | Geometridae   |    | 1935 | 1935 |       |     | 0 | 9  | Generalist | 1 | Pupa  |
| <i>Eupithecia denotata</i>       | Geometridae   |    | 1935 | 1935 |       |     | 1 | 6  | Open       | 2 | Pupa  |
| <i>Eupithecia dodoneata</i>      | Geometridae   |    | 1935 | 1935 |       |     | 1 | 6  | Forest     | 2 | Pupa  |
| <i>Eupithecia exigua</i>         | Geometridae   |    | 1935 | 1935 |       | 5   | 0 | 5  | Generalist | 2 | Pupa  |
| <i>Eupithecia gelidata</i>       | Geometridae   |    | 1935 | 1935 |       |     | 0 | 6  | Generalist | 1 | Pupa  |
| <i>Eupithecia goossensata</i>    | Geometridae   |    | 1935 | 1935 |       |     | 0 | 4  | Generalist | 2 | Pupa  |
| <i>Eupithecia indigata</i>       | Geometridae   |    | 1935 | 1935 | 1     |     | 0 | 5  | Forest     | 2 | Pupa  |
| <i>Eupithecia innotata</i>       | Geometridae   |    | 1935 | 1935 |       |     | 1 | 12 | Open       | 2 | Pupa  |
| <i>Eupithecia insigniata</i>     | Geometridae   |    | 1935 | 1935 |       |     | 0 | 5  | Forest     | 2 | Pupa  |
| <i>Eupithecia inturbata</i>      | Geometridae   |    | 1935 | 1935 |       |     | 0 | 4  | Forest     | 1 | Egg   |
| <i>Eupithecia irriguata</i>      | Geometridae   |    | 1935 | 1935 |       | 23  | 0 | 7  | Forest     | 2 | Pupa  |

|                                |               |    |      |      |     |      |   |    |            |   |       |
|--------------------------------|---------------|----|------|------|-----|------|---|----|------------|---|-------|
| <i>Eupithecia linariata</i>    | Geometridae   |    | 1935 | 1935 |     |      | 0 | 10 | Open       | 1 | Pupa  |
| <i>Eupithecia nanata</i>       | Geometridae   |    | 1935 | 1935 |     |      | 1 | 11 | Open       | 2 | Pupa  |
| <i>Eupithecia pimpinellata</i> | Geometridae   |    | 1935 | 1935 |     |      | 1 | 6  | Open       | 2 | Pupa  |
| <i>Eupithecia plumbeolata</i>  | Geometridae   |    | 1935 | 1935 |     |      | 0 | 7  | Forest     | 2 | Pupa  |
| <i>Eupithecia pygmaeata</i>    | Geometridae   |    | 1935 | 1935 |     |      | 1 | 4  | Open       | 2 | Pupa  |
| <i>Eupithecia sinuosaria</i>   | Geometridae   |    | 1935 | 1935 |     |      | 0 | 7  | Generalist | 2 | Pupa  |
| <i>Eupithecia subumbrosa</i>   | Geometridae   | NT | 1935 | 1935 | 1   |      | 1 | 6  | Open       | 3 | Pupa  |
| <i>Eupithecia tantillaria</i>  | Geometridae   |    | 1935 | 1935 |     |      | 0 | 5  | Forest     | 3 | Pupa  |
| <i>Eupithecia tenuata</i>      | Geometridae   |    | 1935 | 1935 |     |      | 1 | 6  | Forest     | 2 | Egg   |
| <i>Eupithecia tripunctaria</i> | Geometridae   |    | 1935 | 1935 |     |      | 1 | 11 | Open       | 2 | Pupa  |
| <i>Eupithecia valerianata</i>  | Geometridae   |    | 1935 | 1935 |     |      | 0 | 6  | Open       | 2 | Pupa  |
| <i>Eupithecia venosata</i>     | Geometridae   |    | 1935 | 1935 |     |      | 0 | 5  | Open       | 2 | Pupa  |
| <i>Eupithecia virgaureata</i>  | Geometridae   |    | 1935 | 1935 |     |      | 1 | 4  | Generalist | 3 | Pupa  |
| <i>Eustroma reticulata</i>     | Geometridae   |    | 1935 | 1935 |     |      | 0 | 7  | Forest     | 1 | Pupa  |
| <i>Fagivorina arenaria</i>     | Geometridae   |    | 1935 | 1935 |     |      | 0 | 5  | Forest     | 2 | Pupa  |
| <i>Fissipunctia ypsilon</i>    | Noctuidae     |    | 1935 | 1935 | 1   |      | 1 | 5  | Forest     | 2 | Egg   |
| <i>Globia algae</i>            | Noctuidae     |    | 1935 | 1935 |     |      | 0 | 4  | Generalist | 1 | Egg   |
| <i>Globia sparganii</i>        | Noctuidae     |    | 1935 | 1935 |     |      | 0 | 6  | Generalist | 1 | Egg   |
| <i>Gortyna flavago</i>         | Noctuidae     |    | 1935 | 1935 | 27  |      | 0 | 8  | Generalist | 2 | Egg   |
| <i>Gymnoscelis ruffosciata</i> | Geometridae   |    | 1935 | 1935 |     |      | 1 | 15 | Generalist | 3 | Pupa  |
| <i>Hadena perplexa</i>         | Noctuidae     | VU | 1935 | 1935 |     | 1    | 0 | 7  | Open       | 2 | Pupa  |
| <i>Hemitea aestivaria</i>      | Geometridae   |    | 1935 | 1935 |     |      | 0 | 7  | Forest     | 3 | Larva |
| <i>Herminea grisalis</i>       | Erebidae      |    | 1935 | 1935 |     |      | 0 | 6  | Forest     | 3 | Pupa  |
| <i>Hydrelia flammeolaria</i>   | Geometridae   |    | 1935 | 1935 | 9   |      | 0 | 6  | Forest     | 2 | Pupa  |
| <i>Hyles livornica</i>         | Sphingidae    |    | 1935 | 1935 |     |      | 0 | 12 | Generalist | 3 | Egg   |
| <i>Hyponodes humidalis</i>     | Erebidae      |    | 1935 | 1935 |     |      | 0 | 5  | Generalist | 3 | Larva |
| <i>Hypomecis roboraria</i>     | Geometridae   |    | 1935 | 1935 | 7   |      | 1 | 4  | Forest     | 3 | Larva |
| <i>Hyppa rectilinea</i>        | Noctuidae     |    | 1935 | 1935 | 5   |      | 1 | 6  | Forest     | 3 | Larva |
| <i>Idaea deversaria</i>        | Geometridae   |    | 1935 | 1935 |     |      | 0 | 4  | Open       | 2 | Larva |
| <i>Idaea muricata</i>          | Geometridae   |    | 1935 | 1935 |     |      | 1 | 4  | Generalist | 3 | Larva |
| <i>Korscheltellus lupulina</i> | Hepialidae    |    | 1935 | 1935 | 6   | 41   | 0 | 5  | Generalist | 3 | Larva |
| <i>Lacanobia thalassina</i>    | Noctuidae     |    | 1935 | 1935 | 18  |      | 0 | 7  | Generalist | 3 | Pupa  |
| <i>Lampropteryx atrogata</i>   | Geometridae   |    | 1935 | 1935 |     |      | 0 | 6  | Forest     | 1 | Pupa  |
| <i>Lateraligia ophiogramm</i>  | Noctuidae     |    | 1935 | 1935 | 5   |      | 2 | 6  | Forest     | 3 | Larva |
| <i>Lithophane consocia</i>     | Noctuidae     |    | 1935 | 1935 |     |      | 0 | 11 | Generalist | 2 | Imago |
| <i>Litoligia literosa</i>      | Noctuidae     |    | 1935 | 1935 |     |      | 1 | 5  | Open       | 2 | Larva |
| <i>Lomographa bimaculata</i>   | Geometridae   |    | 1935 | 1935 | 2   |      | 0 | 8  | Forest     | 3 | Pupa  |
| <i>Lomographa temerata</i>     | Geometridae   |    | 1935 | 1935 | 8   | 1    | 1 | 7  | Forest     | 3 | Pupa  |
| <i>Luperina testacea</i>       | Noctuidae     |    | 1935 | 1935 | 7   | 2269 | 1 | 6  | Generalist | 3 | Larva |
| <i>Lymantria dispar</i>        | Erebidae      |    | 1935 | 1935 |     | 1    | 0 | 4  | Generalist | 2 | Egg   |
| <i>Macdunnoughia confusus</i>  | Noctuidae     |    | 1935 | 1935 |     | 1    | 0 | 14 | Generalist | 3 | Larva |
| <i>Macroclypea cribrumalis</i> | Erebidae      |    | 1935 | 1935 |     |      | 0 | 5  | Generalist | 3 | Larva |
| <i>Malacodea regelaria</i>     | Geometridae   |    | 1935 | 1935 |     |      | 0 | 6  | Forest     | 2 | Pupa  |
| <i>Martania taeniata</i>       | Geometridae   |    | 1935 | 1935 | 2   |      | 1 | 6  | Generalist | 3 | Larva |
| <i>Melanchna persicariae</i>   | Noctuidae     |    | 1935 | 1935 |     |      | 1 | 8  | Generalist | 3 | Pupa  |
| <i>Mesoligia furuncula</i>     | Noctuidae     |    | 1935 | 1935 |     | 47   | 1 | 5  | Generalist | 3 | Larva |
| <i>Mniotype satura</i>         | Noctuidae     |    | 1935 | 1935 | 55  |      | 0 | 5  | Forest     | 3 | Egg   |
| <i>Mythimna impura</i>         | Noctuidae     |    | 1935 | 1935 | 22  | 30   | 0 | 7  | Generalist | 3 | Larva |
| <i>Mythimna pudorina</i>       | Noctuidae     |    | 1935 | 1935 |     |      | 0 | 7  | Open       | 3 | Larva |
| <i>Mythimna turca</i>          | Noctuidae     |    | 1935 | 1935 |     |      | 0 | 5  | Forest     | 3 | Larva |
| <i>Odontasia sieversii</i>     | Notodontidae  |    | 1935 | 1935 |     |      | 1 | 6  | Forest     | 2 | Pupa  |
| <i>Oligia fasciuncula</i>      | Noctuidae     |    | 1935 | 1935 |     |      | 0 | 5  | Open       | 3 | Larva |
| <i>Operophtera fagata</i>      | Geometridae   |    | 1935 | 1935 | 28  | 10   | 0 | 4  | Forest     | 3 | Egg   |
| <i>Orgyia antiquoides</i>      | Erebidae      |    | 1935 | 1935 |     |      | 0 | 9  | Open       | 1 | Egg   |
| <i>Orthosia cerasi</i>         | Noctuidae     |    | 1935 | 1935 | 30  | 265  | 0 | 6  | Generalist | 3 | Pupa  |
| <i>Orthosia cruda</i>          | Noctuidae     |    | 1935 | 1935 | 18  | 521  | 1 | 6  | Forest     | 3 | Pupa  |
| <i>Orthosia gracilis</i>       | Noctuidae     |    | 1935 | 1935 |     | 1    | 0 | 4  | Generalist | 3 | Pupa  |
| <i>Orthosia miniosa</i>        | Noctuidae     |    | 1935 | 1935 | 15  | 8    | 1 | 4  | Forest     | 2 | Pupa  |
| <i>Orthosia opima</i>          | Noctuidae     |    | 1935 | 1935 | 21  |      | 0 | 5  | Forest     | 3 | Pupa  |
| <i>Orthosia populeti</i>       | Noctuidae     |    | 1935 | 1935 | 21  | 13   | 1 | 6  | Forest     | 2 | Pupa  |
| <i>Ourapteryx sambucaria</i>   | Geometridae   |    | 1935 | 1935 |     |      | 0 | 7  | Generalist | 3 | Larva |
| <i>Paradarisa consonaria</i>   | Geometridae   |    | 1935 | 1935 |     |      | 2 | 5  | Forest     | 3 | Pupa  |
| <i>Pasiphila chloerata</i>     | Geometridae   |    | 1935 | 1935 |     |      | 1 | 5  | Forest     | 2 | Egg   |
| <i>Pennithera firmata</i>      | Geometridae   |    | 1935 | 1935 | 113 |      | 0 | 6  | Forest     | 2 | Egg   |
| <i>Perizoma bifaciata</i>      | Geometridae   |    | 1935 | 1935 |     |      | 0 | 5  | Open       | 1 | Pupa  |
| <i>Perizoma hydrata</i>        | Geometridae   |    | 1935 | 1935 |     |      | 0 | 6  | Open       | 1 | Pupa  |
| <i>Phlogophora meticulosa</i>  | Noctuidae     |    | 1935 | 1935 | 8   | 2    | 1 | 8  | Generalist | 3 | Egg   |
| <i>Photodes fluxa</i>          | Noctuidae     |    | 1935 | 1935 |     | 5    | 1 | 4  | Generalist | 3 | Larva |
| <i>Photodes minima</i>         | Noctuidae     |    | 1935 | 1935 | 6   | 1    | 0 | 7  | Generalist | 2 | Larva |
| <i>Polychrysis moneta</i>      | Noctuidae     |    | 1935 | 1935 |     |      | 0 | 7  | Open       | 2 | Larva |
| <i>Protolampra sobrina</i>     | Noctuidae     |    | 1935 | 1935 | 1   |      | 0 | 4  | Forest     | 3 | Larva |
| <i>Pyrrhia umbra</i>           | Noctuidae     |    | 1935 | 1935 |     |      | 0 | 8  | Generalist | 3 | Pupa  |
| <i>Rheumaptera cervalis</i>    | Geometridae   |    | 1935 | 1935 |     |      | 0 | 6  | Generalist | 1 | Pupa  |
| <i>Rhizedra lutosia</i>        | Noctuidae     |    | 1935 | 1935 | 2   | 23   | 1 | 6  | Generalist | 3 | Egg   |
| <i>Scopula rubiginata</i>      | Geometridae   |    | 1935 | 1935 |     |      | 1 | 10 | Open       | 1 | Larva |
| <i>Selenia tetralunaria</i>    | Geometridae   |    | 1935 | 1935 | 7   |      | 1 | 11 | Forest     | 3 | Pupa  |
| <i>Spargania luctuata</i>      | Geometridae   |    | 1935 | 1935 |     |      | 1 | 11 | Generalist | 2 | Pupa  |
| <i>Spilosoma urticae</i>       | Erebidae      |    | 1935 | 1935 |     |      | 0 | 8  | Generalist | 3 | Larva |
| <i>Syngrapha microgamm</i>     | Noctuidae     |    | 1935 | 1935 |     |      | 0 | 4  | Generalist | 3 | Larva |
| <i>Tetheella fluctuosa</i>     | Drepanidae    |    | 1935 | 1935 | 59  |      | 2 | 5  | Forest     | 2 | Pupa  |
| <i>Thera abeliscata</i>        | Geometridae   |    | 1935 | 1935 | 160 | 10   | 2 | 16 | Forest     | 2 | Larva |
| <i>Tiliacea auraga</i>         | Noctuidae     |    | 1935 | 1935 | 11  | 5    | 1 | 5  | Forest     | 2 | Egg   |
| <i>Trachea atriplicis</i>      | Noctuidae     |    | 1935 | 1935 | 1   | 1    | 0 | 8  | Generalist | 3 | Pupa  |
| <i>Trichiura crataegi</i>      | Lasiocampidae |    | 1935 | 1935 |     |      | 0 | 5  | Generalist | 3 | Egg   |
| <i>Trisoteles emortualis</i>   | Erebidae      |    | 1935 | 1935 |     |      | 0 | 8  | Forest     | 2 | Pupa  |
| <i>Venusia cambrica</i>        | Geometridae   |    | 1935 | 1935 |     |      | 0 | 7  | Forest     | 2 | Larva |
| <i>Xanthorhoe decoloraria</i>  | Geometridae   |    | 1935 | 1935 |     |      | 1 | 5  | Open       | 2 | Larva |
| <i>Xestia alpicola</i>         | Noctuidae     |    | 1935 | 1935 |     |      | 0 | 4  | Forest     | 3 | Larva |
| <i>Xestia ashworthii</i>       | Noctuidae     |    | 1935 | 1935 |     |      | 2 | 8  | Open       | 3 | Larva |
| <i>Xestia castanea</i>         | Noctuidae     |    | 1935 | 1935 |     |      | 1 | 6  | Open       | 3 | Larva |
| <i>Xestia sexstrigata</i>      | Noctuidae     |    | 1935 | 1935 | 73  | 35   | 0 | 4  | Forest     | 3 | Larva |
| <i>Xestia sincera</i>          | Noctuidae     |    | 1935 | 1935 |     |      | 0 | 5  | Forest     | 2 | Larva |
| <i>Xestia speciosa</i>         | Noctuidae     |    | 1935 | 1935 |     |      | 1 | 7  | Forest     | 3 | Larva |
| <i>Zeuzera pyrina</i>          | Cossidae      |    | 1935 | 1935 |     |      | 0 | 6  | Generalist | 3 | Larva |
| <i>Ipimorpha retusa</i>        | Noctuidae     |    | 1969 | 1935 |     |      | 0 | 7  | Forest     | 2 | Egg   |
| <i>Lampropteryx suffumata</i>  | Geometridae   |    | 1972 | 1935 | 1   | 2    | 0 | 7  | Open       | 2 | Pupa  |
| <i>Cucullia asteris</i>        | Noctuidae     |    | 1974 | 1935 |     |      | 0 | 7  | Open       | 2 | Pupa  |
| <i>Polyplaca ridens</i>        | Drepanidae    |    | 1978 | 1935 |     |      | 1 | 4  | Forest     | 2 | Pupa  |
| <i>Cucullia gnaphalii</i>      | Noctuidae     |    | 1984 | 1935 |     |      | 0 | 5  | Open       | 2 | Pupa  |
| <i>Euxoa cursoria</i>          | Noctuidae     |    | 1989 | 1935 |     |      | 2 | 8  | Open       | 3 | Larva |
| <i>Cymatopharina diluta</i>    | Drepanidae    |    | 2003 | 1935 |     |      | 1 | 4  | Forest     | 2 | Egg   |
| <i>Daphnis nerii</i>           | Sphingidae    |    | 2011 | 1935 |     |      | 0 | 11 | Open       | 1 | Pupa  |
| <i>Longolates elymi</i>        | Noctuidae     |    | 2011 | 1935 |     |      | 0 | 6  | Generalist | 1 | Larva |
| <i>Rheumaptera subhastata</i>  | Geometridae   |    | 2011 | 1935 |     |      | 1 | 5  | Generalist | 3 | Pupa  |
| <i>Agrotis ripae</i>           | Noctuidae     |    |      | 1935 |     |      | 1 | 6  | Generalist | 3 | Larva |
| <i>Eupithecia cauchiata</i>    | Geometridae   |    |      | 1935 |     |      | 1 | 6  | Forest     | 2 | Pupa  |
| <i>Eupithecia immundata</i>    | Geometridae   |    |      | 1935 |     |      | 0 | 3  | Forest     | 1 | Pupa  |
| <i>Euxoa recussa</i>           | Noctuidae     |    |      | 1935 |     |      | 1 | 5  | Open       | 3 | Larva |
| <i>Hadena caesia</i>           | Noctuidae     |    |      | 1935 |     |      | 0 | 6  | Generalist | 1 | Larva |
| <i>Mesogona oxalina</i>        | Noctuidae     |    |      | 1935 |     |      | 0 | 4  | Generalist | 2 | Egg   |
| <i>Mythimna straminea</i>      | Noctuidae     |    |      | 1935 |     |      | 0 | 7  | Generalist | 3 | Larva |
| <i>Paracalax tristalis</i>     | Erebidae      |    |      | 1935 |     |      | 0 | 7  | Forest     | 3 | Larva |
| <i>Polymixis flavicincta</i>   | Noctuidae     |    |      | 1935 |     |      | 1 | 4  | Generalist | 2 | Egg   |
| <i>Scotapteryx mucronata</i>   | Geometridae   |    |      | 1935 |     |      | 0 | 4  | Open       | 1 | Pupa  |
| <i>Trichopteryx polycomm</i>   | Geometridae   |    |      | 1935 |     |      | 0 | 4  | Forest     | 1 | Pupa  |
| <i>Zanclognatha lunalis</i>    | Erebidae      |    |      | 1935 |     |      | 1 | 6  | Generalist | 3 | Larva |
| <i>Hydraecia ultima</i>        | Noctuidae     |    | 1935 | 1945 |     | 1    | 1 | 4  | Generalist | 1 | Egg   |
| <i>Nola aerugula</i>           | Nolidae       |    | 1935 | 1957 |     |      | 2 | 6  | Generalist | 3 | Larva |
| <i>Amphipyra perflua</i>       | Noctuidae     |    | 1935 | 1967 |     |      | 0 | 4  | Forest     | 2 | Egg   |
| <i>Ennomos autumnaria</i>      | Geometridae   |    | 1900 | 1968 |     |      | 0 | 7  | Forest     | 3 | Egg   |
| <i>Asteroscopus sphinx</i>     | Noctuidae     |    | 1984 | 1968 |     |      | 0 | 3  | Forest     | 3 | Egg   |
| <i>Gluphisia crenata</i>       | Notodontidae  |    | 193  |      |     |      |   |    |            |   |       |

|                                 |               |    |      |      |  |     |     |    |            |            |       |
|---------------------------------|---------------|----|------|------|--|-----|-----|----|------------|------------|-------|
| <i>Pachynemia hippocast</i>     | Geometridae   |    |      | 1975 |  |     | 0   | 13 | Open       | 2          | Pupa  |
| <i>Drymonia dodonaea</i>        | Notodontidae  |    | 1935 | 1976 |  |     | 0   | 8  | Forest     | 3          | Pupa  |
| <i>Eremobia ochroleuca</i>      | Noctuidae     |    | 1935 | 1976 |  | 1   | 0   | 7  | Open       | 3          | Larva |
| <i>Peribatodes rhomboida</i>    | Geometridae   |    | 1986 | 1976 |  | 1   | 3   | 1  | 6          | Generalist | 3     |
| <i>Eugnorisma depuncta</i>      | Noctuidae     |    | 1935 | 1977 |  | 1   | 0   | 4  | Forest     | 3          | Larva |
| <i>Apamea scolopacina</i>       | Noctuidae     |    | 1935 | 1978 |  | 14  | 1   | 6  | Forest     | 3          | Larva |
| <i>Gagitodes sagittata</i>      | Geometridae   |    | 1978 | 1978 |  |     | 0   | 5  | Forest     | 1          | Pupa  |
| <i>Heterothera serraria</i>     | Geometridae   |    | 1985 | 1978 |  |     | 0   | 5  | Forest     | 2          | Larva |
| <i>Eupithecia trisignaria</i>   | Geometridae   |    | 1935 | 1979 |  |     | 1   | 9  | Open       | 2          | Pupa  |
| <i>Watsonalla cultaria</i>      | Drepanidae    |    | 1935 | 1983 |  |     | 1   | 9  | Forest     | 2          | Pupa  |
| <i>Idaea sylvestraria</i>       | Geometridae   |    | 1900 | 1984 |  |     | 0   | 6  | Open       | 2          | Larva |
| <i>Chloroclystis v-dta</i>      | Geometridae   |    | 1993 | 1984 |  |     | 1   | 0  | 10         | Forest     | 3     |
| <i>Actebia fenicia</i>          | Noctuidae     |    | 1935 | 1985 |  |     | 0   | 7  | Open       | 3          | Larva |
| <i>Apamea rubivena</i>          | Noctuidae     |    | 1935 | 1985 |  | 5   | 0   | 6  | Forest     | 3          | Larva |
| <i>Habrosyne pyritoides</i>     | Drepanidae    |    | 1925 | 1985 |  | 1   | 0   | 8  | Generalist | 3          | Pupa  |
| <i>Clostera anastomosis</i>     | Notodontidae  |    | 1900 | 1989 |  |     | 1   | 5  | Forest     | 2          | Larva |
| <i>Philereme transversata</i>   | Geometridae   |    | 1935 | 1989 |  |     | 0   | 6  | Open       | 3          | Egg   |
| <i>Noctua janthe</i>            | Noctuidae     |    | 1992 | 1991 |  | 4   | 9   | 1  | 7          | Generalist | 3     |
| <i>Venusia blomeri</i>          | Geometridae   |    | 1985 | 1993 |  |     | 0   | 5  | Forest     | 1          | Pupa  |
| <i>Tethea ocularis</i>          | Drepanidae    |    | 1935 | 1994 |  |     | 0   | 3  | Forest     | 2          | Pupa  |
| <i>Pseudopanthera macul</i>     | Geometridae   |    | 1935 | 1995 |  |     | 0   | 5  | Generalist | 3          | Pupa  |
| <i>Chesias legatella</i>        | Geometridae   |    | 1935 | 1996 |  |     | 0   | 4  | Generalist | 1          | Egg   |
| <i>Nyctela asiatica</i>         | Nolidae       |    | 1935 | 1998 |  |     | 0   | 7  | Generalist | 3          | Imago |
| <i>Protoschinia scutosa</i>     | Noctuidae     |    | 1999 | 1998 |  |     | 0   | 7  | Generalist | 2          | Pupa  |
| <i>Orthonomia obtipata</i>      | Geometridae   |    | 2016 | 2001 |  |     | 2   | 11 | Generalist | 2          | Imago |
| <i>Eucarta virgo</i>            | Noctuidae     |    | 2004 | 2002 |  |     | 0   | 12 | Generalist | 2          | Pupa  |
| <i>Autographa macrogam</i>      | Noctuidae     |    |      | 2003 |  |     | 0   | 6  | Open       | 3          | Larva |
| <i>Chrysodeixis chalcites</i>   | Noctuidae     |    |      | 2004 |  |     | 0   | 16 | Generalist | 3          | Larva |
| <i>Autographa mandarina</i>     | Noctuidae     |    | 1935 | 2005 |  |     | 0   | 11 | Generalist | 3          | Larva |
| <i>Peridroma saucia</i>         | Noctuidae     |    | 2003 | 2006 |  |     | 2   | 9  | Generalist | 3          | Larva |
| <i>Hadena bicruris</i>          | Hadena        | NT | 1900 | 2010 |  |     | 1   | 0  | 13         | Generalist | 2     |
| <i>Apochima hispidaria</i>      | Geometridae   |    | 1935 | 2010 |  | 2   | 4   | 1  | 6          | Forest     | 2     |
| <i>Comibaena bajularia</i>      | Geometridae   |    | 1935 | 2010 |  |     | 0   | 4  | Forest     | 2          | Larva |
| <i>Eupithecia abbreviata</i>    | Geometridae   |    | 1935 | 2010 |  |     | 1   | 7  | Forest     | 2          | Pupa  |
| <i>Lenisa geminipuncta</i>      | Noctuidae     |    | 1935 | 2010 |  |     | 1   | 6  | Generalist | 1          | Egg   |
| <i>Noctua interjecta</i>        | Noctuidae     |    | 1935 | 2010 |  | 2   | 3   | 1  | 4          | Generalist | 3     |
| <i>Tyria jacobaeae</i>          | Erebidae      |    | 1935 | 2010 |  |     | 0   | 3  | Open       | 1          | Pupa  |
| <i>Miltochrista miniata</i>     | Erebidae      |    | 1989 | 2010 |  | 196 | 1   | 5  | Open       | 3          | Larva |
| <i>Anorthoa munda</i>           | Noctuidae     |    | 1991 | 2010 |  | 14  | 7   | 0  | 5          | Forest     | 3     |
| <i>Watsonalla binaria</i>       | Drepanidae    |    | 1995 | 2010 |  | 3   | 16  | 1  | 10         | Forest     | 2     |
| <i>Mama alipum</i>              | Noctuidae     |    | 1935 | 2011 |  | 1   | 0   | 4  | Forest     | 3          | Pupa  |
| <i>Eilema sororcula</i>         | Erebidae      |    | 1986 | 2011 |  |     | 9   | 0  | 3          | Forest     | 3     |
| <i>Thera britannica</i>         | Geometridae   |    |      | 2011 |  |     | 2   | 11 | Generalist | 1          | Egg   |
| <i>Eupithecia millefoliata</i>  | Geometridae   |    | 1935 | 2013 |  |     | 1   | 7  | Open       | 2          | Pupa  |
| <i>Bryophila domestica</i>      | Noctuidae     |    | 1935 | 2014 |  |     | 0   | 5  | Generalist | 3          | Larva |
| <i>Hypomecis punctinalis</i>    | Geometridae   |    | 1935 | 2014 |  | 19  | 3   | 1  | 7          | Forest     | 3     |
| <i>Aplocera efformata</i>       | Geometridae   |    | 1977 | 2014 |  |     | 0   | 12 | Open       | 2          | Larva |
| <i>Hoplodrina ambigua</i>       | Noctuidae     |    | 2009 | 2014 |  |     | 337 | 0  | 6          | Open       | 3     |
| <i>Nyctobrya muralis</i>        | Noctuidae     |    |      | 2015 |  |     | 0   | 5  | Generalist | 3          | Larva |
| <i>Idaea fuscovenosa</i>        | Geometridae   |    | 1900 | 2016 |  |     | 0   | 4  | Open       | 2          | Larva |
| <i>Helicoverpa armigera</i>     | Noctuidae     |    | 2006 | 2016 |  |     | 0   | 13 | Generalist | 3          | Pupa  |
| <i>Clostera anachoreta</i>      | Notodontidae  |    | 1900 | 2017 |  |     | 0   | 5  | Forest     | 2          | Pupa  |
| <i>Eupithecia haworthiata</i>   | Geometridae   |    | 1982 | 2019 |  |     | 0   | 6  | Open       | 1          | Pupa  |
| <i>Eupithecia ochridata</i>     | Geometridae   |    | 1989 | 2019 |  |     | 1   | 4  | Generalist | 2          | Pupa  |
| <i>Epirrita autumnata</i>       | Geometridae   |    | 1900 | 1900 |  | 346 | 84  | 1  | 3          | Generalist | 3     |
| <i>Acrionicta albavensis</i>    | Noctuidae     |    | 1900 |      |  |     | 1   | 8  | Generalist | 3          | Pupa  |
| <i>Costacanvexa polygram</i>    | Geometridae   |    | 1900 |      |  |     | 0   | 10 | Open       | 2          | Pupa  |
| <i>Eilema pygmaeola</i>         | Erebidae      |    | 1900 |      |  |     | 0   | 3  | Open       | 3          | Larva |
| <i>Gastropacha quercifolia</i>  | Lasiocampidae |    | 1900 |      |  |     | 0   | 5  | Forest     | 3          | Larva |
| <i>Idaea humilata</i>           | Geometridae   |    | 1900 |      |  |     | 0   | 5  | Open       | 2          | Larva |
| <i>Lemonia dumi</i>             | Brahmaeidae   |    | 1900 |      |  |     | 0   | 4  | Open       | 3          | Larva |
| <i>Abrostola asclepiadis</i>    | Noctuidae     |    | 1935 |      |  |     | 0   | 6  | Generalist | 1          | Pupa  |
| <i>Acontia trabecalis</i>       | Noctuidae     |    | 1935 |      |  |     | 0   | 8  | Open       | 2          | Pupa  |
| <i>Acrionicta strigosa</i>      | Noctuidae     |    | 1935 |      |  |     | 1   | 4  | Forest     | 3          | Pupa  |
| <i>Callimorpha dominula</i>     | Erebidae      |    | 1935 |      |  |     | 1   | 3  | Forest     | 3          | Larva |
| <i>Catarhoe rubidata</i>        | Geometridae   |    | 1935 |      |  |     | 0   | 5  | Open       | 2          | Pupa  |
| <i>Catocala fulminea</i>        | Erebidae      |    | 1935 |      |  |     | 1   | 4  | Generalist | 3          | Egg   |
| <i>Cerastis leucographa</i>     | Noctuidae     |    | 1935 |      |  |     | 0   | 6  | Forest     | 3          | Pupa  |
| <i>Cucullia artemisiae</i>      | Noctuidae     |    | 1935 |      |  |     | 0   | 5  | Generalist | 2          | Pupa  |
| <i>Cucullia fraudatrix</i>      | Noctuidae     |    | 1935 |      |  |     | 0   | 6  | Generalist | 2          | Pupa  |
| <i>Cucullia lychnitis</i>       | Noctuidae     |    | 1935 |      |  |     | 0   | 7  | Generalist | 1          | Pupa  |
| <i>Cucullia scrophulariae</i>   | Noctuidae     |    | 1935 |      |  |     | 0   | 7  | Generalist | 1          | Pupa  |
| <i>Cucullia verbasci</i>        | Noctuidae     |    | 1935 |      |  |     | 0   | 6  | Generalist | 1          | Pupa  |
| <i>Deltoea deceptoria</i>       | Noctuidae     |    | 1935 |      |  |     | 0   | 6  | Forest     | 2          | Pupa  |
| <i>Dysauxes ancilla</i>         | Erebidae      |    | 1935 |      |  |     | 0   | 3  | Open       | 3          | Larva |
| <i>Eilema griscola</i>          | Erebidae      |    | 1935 |      |  |     | 0   | 7  | Forest     | 3          | Larva |
| <i>Elaphria venustula</i>       | Noctuidae     |    | 1935 |      |  |     | 0   | 5  | Forest     | 3          | Larva |
| <i>Eublemma minutata</i>        | Erebidae      |    | 1935 |      |  |     | 0   | 5  | Open       | 1          | Pupa  |
| <i>Euphylla biangulata</i>      | Geometridae   |    | 1935 |      |  |     | 0   | 7  | Forest     | 2          | Pupa  |
| <i>Eupithecia orphnata</i>      | Geometridae   |    | 1935 |      |  |     | 1   | 5  | Open       | 3          | Pupa  |
| <i>Euproctis chrysorrhoea</i>   | Erebidae      |    | 1935 |      |  |     | 0   | 4  | Generalist | 3          | Larva |
| <i>Euxoa vitta</i>              | Noctuidae     |    | 1935 |      |  |     | 0   | 6  | Open       | 3          | Larva |
| <i>Hadena compta</i>            | Noctuidae     |    | 1935 |      |  |     | 0   | 8  | Generalist | 2          | Pupa  |
| <i>Hadena filigrana</i>         | Noctuidae     |    | 1935 |      |  |     | 0   | 6  | Open       | 1          | Pupa  |
| <i>Hadena irregularis</i>       | Noctuidae     |    | 1935 |      |  |     | 0   | 5  | Open       | 1          | Pupa  |
| <i>Harpyia milhauseri</i>       | Notodontidae  |    | 1935 |      |  |     | 0   | 7  | Forest     | 2          | Pupa  |
| <i>Heliothis viriplaca</i>      | Noctuidae     |    | 1935 |      |  |     | 0   | 10 | Open       | 1          | Pupa  |
| <i>Hydracacia nordstroemi</i>   | Noctuidae     |    | 1935 |      |  | 46  | 1   | 8  | Generalist | 3          | Egg   |
| <i>Hyles euphorbiae</i>         | Sphingidae    |    | 1935 |      |  |     | 0   | 5  | Generalist | 1          | Egg   |
| <i>Locamobia w-latinum</i>      | Noctuidae     |    | 1935 |      |  |     | 0   | 4  | Generalist | 2          | Pupa  |
| <i>Lithostegia griscolata</i>   | Geometridae   |    | 1935 |      |  |     | 0   | 5  | Open       | 2          | Pupa  |
| <i>Lycia pomanaria</i>          | Geometridae   |    | 1935 |      |  |     | 0   | 3  | Generalist | 3          | Pupa  |
| <i>Mythimna albipuncta</i>      | Noctuidae     |    | 1935 |      |  |     | 0   | 9  | Open       | 3          | Larva |
| <i>Nyctela svecicus</i>         | Nolidae       |    | 1935 |      |  |     | 0   | 15 | Forest     | 2          | Imago |
| <i>Pachetra sagittigera</i>     | Noctuidae     |    | 1935 |      |  |     | 0   | 6  | Generalist | 3          | Larva |
| <i>Pelusia muscerda</i>         | Erebidae      |    | 1935 |      |  |     | 0   | 6  | Forest     | 3          | Larva |
| <i>Pseudeustrotia candida</i>   | Noctuidae     |    | 1935 |      |  |     | 0   | 6  | Generalist | 3          | Pupa  |
| <i>Pygoera timon</i>            | Notodontidae  |    | 1935 |      |  |     | 0   | 5  | Forest     | 2          | Pupa  |
| <i>Sabra harpagula</i>          | Drepanidae    |    | 1935 |      |  |     | 0   | 5  | Forest     | 1          | Pupa  |
| <i>Scopula decorata</i>         | Geometridae   |    | 1935 |      |  |     | 0   | 7  | Open       | 1          | Larva |
| <i>Scopula ornata</i>           | Geometridae   |    | 1935 |      |  |     | 0   | 12 | Open       | 2          | Larva |
| <i>Scotopteryx luridata</i>     | Geometridae   |    | 1935 |      |  |     | 1   | 7  | Open       | 1          | Larva |
| <i>Setina roscida</i>           | Erebidae      |    | 1935 |      |  |     | 1   | 6  | Open       | 3          | Larva |
| <i>Spiris striata</i>           | Erebidae      |    | 1935 |      |  |     | 1   | 5  | Open       | 1          | Larva |
| <i>Spodoptera exigua</i>        | Noctuidae     |    | 1935 |      |  |     | 0   | 10 | Generalist | 3          | Larva |
| <i>Tyta luctuosa</i>            | Noctuidae     |    | 1935 |      |  |     | 0   | 9  | Open       | 2          | Larva |
| <i>Sideritis turbida</i>        | Noctuidae     |    | 1942 |      |  |     | 0   | 7  | Generalist | 3          | Pupa  |
| <i>Hydrelia sylvata</i>         | Geometridae   |    | 1964 |      |  |     | 0   | 5  | Forest     | 2          | Pupa  |
| <i>Oligia versicolor</i>        | Noctuidae     |    | 1966 |      |  |     | 0   | 7  | Forest     | 2          | Larva |
| <i>Acassus terebra</i>          | Cossidae      |    | 1974 |      |  |     | 0   | 2  | Forest     | 1          | Larva |
| <i>Heliothis peltigera</i>      | Noctuidae     |    | 1975 |      |  |     | 0   | 16 | Generalist | 3          | Pupa  |
| <i>Selidosema brunnearia</i>    | Geometridae   |    | 1975 |      |  |     | 1   | 5  | Open       | 2          | Larva |
| <i>Theria rupicaprana</i>       | Geometridae   |    | 1975 |      |  |     | 0   | 3  | Open       | 2          | Pupa  |
| <i>Rhadometra saccharia</i>     | Geometridae   |    | 1983 |      |  |     | 1   | 6  | Generalist | 3          | Larva |
| <i>Noctua janthina</i>          | Noctuidae     |    | 1984 |      |  | 5   | 0   | 4  | Generalist | 3          | Larva |
| <i>Phragmataecia castane</i>    | Cossidae      |    | 1984 |      |  |     | 0   | 5  | Generalist | 2          | Larva |
| <i>Horisme vitalbata</i>        | Geometridae   |    | 1985 |      |  |     | 0   | 6  | Open       | 2          | Pupa  |
| <i>Pelusia obtusa</i>           | Erebidae      |    | 1986 |      |  |     | 0   | 3  | Generalist | 1          | Larva |
| <i>Noctua interposita</i>       | Noctuidae     |    | 1991 |      |  | 2   | 1   | 7  | Generalist | 3          | Larva |
| <i>Apamea epomidion</i>         | Noctuidae     |    | 1992 |      |  |     | 0   | 8  | Forest     | 2          | Larva |
| <i>Cirrhia ocellaris</i>        | Noctuidae     |    | 1992 |      |  |     | 1   | 5  | Generalist | 1          | Egg   |
| <i>Proxenus lepigone</i>        | Noctuidae     |    | 1994 |      |  |     | 0   | 4  | Generalist | 1          | Larva |
| <i>Grammodes stolidia</i>       | Erebidae      |    | 1996 |      |  |     | 0   | 12 | Generalist | 3          | Egg   |
| <i>Thaumetopoea pinivora</i>    | Notodontidae  |    | 1996 |      |  |     | 0   | 7  | Forest     | 2          | Larva |
| <i>Pabulatrix pabulatricula</i> | Noctuidae     |    | 1997 |      |  |     | 0   | 4  | Forest     | 3          | Egg   |
| <i>Athetis gluteosa</i>         | Noctuidae     |    | 2002 |      |  |     | 0   | 4  | Generalist | 1          | Larva |

|                               |             |      |  |  |     |   |    |            |   |       |
|-------------------------------|-------------|------|--|--|-----|---|----|------------|---|-------|
| <i>Colobochyla salicalis</i>  | Erebidae    | 2003 |  |  |     | 0 | 4  | Generalist | 2 | Pupa  |
| <i>Heterogenea asella</i>     | Limacodidae | 2003 |  |  |     | 0 | 7  | Forest     | 2 | Pupa  |
| <i>Meganola albula</i>        | Nolidae     | 2004 |  |  |     | 1 | 6  | Generalist | 3 | Larva |
| <i>Mythimna unipuncta</i>     | Noctuidae   | 2004 |  |  |     | 0 | 8  | Generalist | 3 | Egg   |
| <i>Sedina buettneri</i>       | Noctuidae   | 2004 |  |  |     | 0 | 4  | Generalist | 1 | Egg   |
| <i>Deltote bankiana</i>       | Noctuidae   | 2005 |  |  | 1   | 0 | 7  | Open       | 2 | Pupa  |
| <i>Schrankia taenialis</i>    | Erebidae    | 2006 |  |  |     | 0 | 3  | Forest     | 2 | Larva |
| <i>Hippotion celerio</i>      | Sphingidae  | 2010 |  |  |     | 0 | 12 | Generalist | 3 | Egg   |
| <i>Calyptra thalictri</i>     | Erebidae    | 2014 |  |  |     | 0 | 5  | Forest     | 1 | Larva |
| <i>Agrotis puta</i>           | Noctuidae   | 2016 |  |  |     | 2 | 8  | Generalist | 3 | Larva |
| <i>Catocala elocata</i>       | Erebidae    | 2016 |  |  |     | 0 | 6  | Forest     | 2 | Egg   |
| <i>Cyclophora parata</i>      | Geometridae | 2016 |  |  |     | 1 | 8  | Forest     | 2 | Pupa  |
| <i>Xanthorhoe annotinata</i>  | Geometridae | 2016 |  |  |     | 0 | 5  | Forest     | 2 | Larva |
| <i>Cryphia algae</i>          | Noctuidae   | 2017 |  |  | 118 | 1 | 5  | Generalist | 3 | Larva |
| <i>Cyclophora annularia</i>   | Geometridae | 2017 |  |  |     | 0 | 4  | Generalist | 1 | Pupa  |
| <i>Idaea triginata</i>        | Geometridae | 2017 |  |  |     | 0 | 4  | Generalist | 3 | Larva |
| <i>Thetidia smaragdaria</i>   | Geometridae | 2017 |  |  |     | 0 | 4  | Open       | 2 | Larva |
| <i>Caradrina kadenii</i>      | Noctuidae   | 2019 |  |  |     | 1 | 18 | Generalist | 3 | Pupa  |
| <i>Eupithecia pulchellata</i> | Geometridae | 2019 |  |  |     | 0 | 4  | Open       | 1 | Pupa  |
| <i>Mythimna vitellina</i>     | Noctuidae   | 2019 |  |  |     | 0 | 10 | Generalist | 3 | Pupa  |
| <i>Canisania luteago</i>      | Noctuidae   | 2020 |  |  | 1   | 0 | 8  | Generalist | 3 | Pupa  |
